# Supplementary material
Source: PubMed Central journal article supplement (PMC5782797)
Supplement: NIHMS931964-supplement-Supplemental.pdf [file NIHMS931964-supplement-Supplemental.pdf]

## Supplementary Online Content

Swaminathan SS, Field MG, Sant D, et al. Molecular characteristics of conjunctival melanoma using whole-exome sequencing. *JAMA Ophthalmol*. Published online November 9, 2017. doi:10.1001/jamaophthalmol.2017.4837

**eAppendix.** Additional Methods

**eFigure.** Schematic diagram of the customized sequencing and data analysis pipeline

**eTable 1.** Broad copy number aberrations (Broad Regions) regions identified by GISTIC analysis with a q-value significance score  $< 0.2$ .

**eTable 2.** Specific amplified (Amp\_Genes) regions identified by GISTIC analysis with a q-value significance score  $< 0.2$ .

**eTable 3.** List of specific amplified genes identified by GISTIC analysis.

**eTable 4.** Specific deleted gene (Del\_Genes) regions identified by GISTIC analysis with a q-value significance score  $< 0.2$ .

This supplementary material has been provided by the authors to give readers additional information about their work.

## **eAppendix.** Additional Methods

Genomic DNA from FFPE sections was purified by RecoverAll Total Nucleic Acid Isolation Kit (Thermo, Rockland, DE) following the manufacturer's instructions. The quantity and quality of DNA was evaluated by a nanodrop 8000 spectrophotometer (Thermo, Rockland, DE) and a Bioanalyzer 2000 (Agilent, Palo Alto, CA), respectively. Whole exome sequencing was conducted in the Sequencing Core facility at the John P. Hussman Institute for Human Genomics in the University of Miami. Briefly, DNA samples were sheared using an E210 sonicator (Covaris, Woburn, MA) and the whole exome was captured using the SureSelect XT Human All Exon V5 kit (Agilent, Palo Alto, CA). To sequence the enriched 50Mb exomes, a 3-plex strategy per lane was conducted on the HiSeq 2000 sequencer (Illumina, San Diego, CA) using 125-bp paired-end reads, which yielded an average ~100× coverage depth at targeted regions.

Sequences were aligned to the human genome hg19 using NovoAlign (<http://www.novocraft.com/products/novoalign/>). Quality control and file manipulation was performed with FastQC, PICARD and SAMtools.<sup>1</sup> Variant calling was performed using MuTect2.<sup>2</sup> Variants predicted to be germline by the algorithms in MuTect2 or present in a panel of normal samples (n = 117, samples from blood to represent germline) were removed. To minimize artifact introduced by the specimen archiving process,<sup>3</sup> we filtered out all variants present in less than 20% of sequencing reads. Additionally, variants were excluded if they were outside of coding or splicing regions, had fewer than 3 alternate reads, were present in greater than 0.5% of the population, or were predicted to be non-damaging using ANNOVAR.<sup>4</sup>

1. Li H, Handsaker B, Wysoker A, et al. The Sequence Alignment/Map format and SAMtools. *Bioinformatics* 2009; 25(16):2078-9.
2. McKenna A, Hanna M, Banks E, et al. The Genome Analysis Toolkit: a MapReduce framework for analyzing next-generation DNA sequencing data. *Genome Res* 2010; 20(9):1297-303.
3. Wong SQ, Li J, Tan AYC et al. Sequence artefacts in a prospective series of formalin-fixed tumours tested for mutations in hotspot regions by massive parallel sequencing. *BMC Medical Genomics* 2014; 7:23.
4. Wang K, Li M, Hakonarson H. ANNOVAR: functional annotation of genetic variants from high-throughput sequencing data. *Nucleic Acids Res* 2010; 38(16):e164.

**eFigure 1.** Schematic diagram of the customized sequencing and data analysis pipeline.

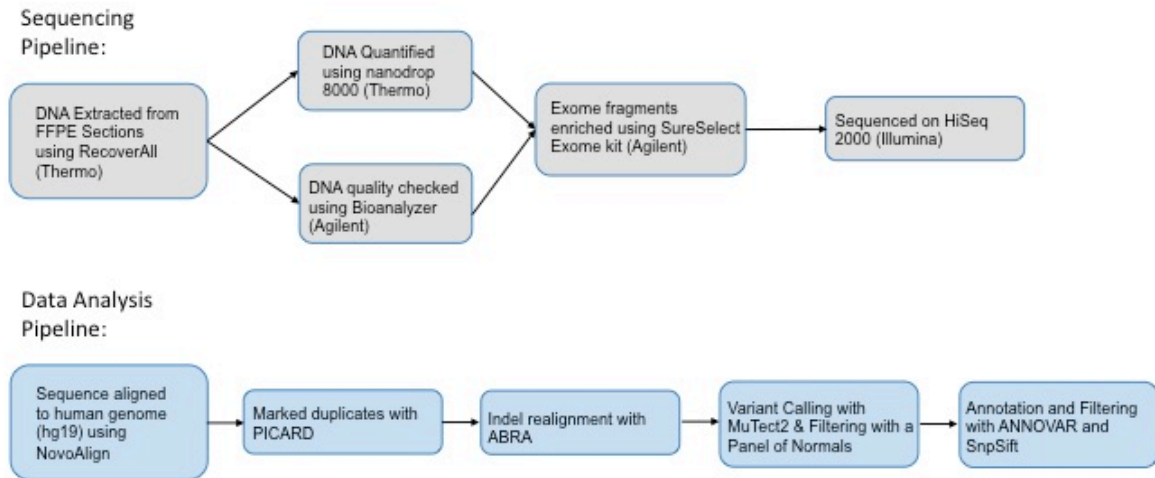

**eTable 1.** Broad copy number aberrations (Broad Regions) regions identified by GISTIC analysis with a q-value significance score < 0.2. Chromosome 6p gain was noted in all samples.

| Arm | # Genes | Amp frequency | Amp frequency score | Amp z-score | Amp q-value | Arm | # Genes | Del frequency | Del frequency score | Del z-score | Del q-value |
|-----|---------|---------------|---------------------|-------------|-------------|-----|---------|---------------|---------------------|-------------|-------------|
| 1q  | 1955    | 0.4           | 0.4                 | 1.97        | 0.155       | 16p | 872     | 0.6           | 0.6                 | 2.47        | 0.0502      |
| 6p  | 1173    | 1             | 1                   | 5.1         | 7.43E-06    | 16q | 702     | 0.6           | 0.6                 | 2.36        | 0.0573      |
| 6q  | 839     | 0.6           | 0.6                 | 2.44        | 0.0532      | 19q | 1709    | 0.4           | 0.4                 | 1.78        | 0.182       |
| 8q  | 859     | 0.6           | 0.6                 | 2.46        | 0.0532      | 21p | 13      | 1             | 1                   | 4.13        | 0.000264    |
|     |         |               |                     |             |             | 21q | 509     | 0.6           | 0.6                 | 2.25        | 0.0672      |

**eTable 2.** Specific amplified (Amp\_Genes) regions identified by GISTIC analysis with a q-value significance score < 0.2. Chromosome 6p gain was noted in all samples.

| cytoband             | 1p36.13              | 4p15.33                | 5q13.2                 | 6p22.1                 | 6p22.1           | 8q12.1                 | 9p13.1                 | 11q13.1                 | 12p13.31              | 15q26.3                   | 16p11.2                 | 17q21.2                 |
|----------------------|----------------------|------------------------|------------------------|------------------------|------------------|------------------------|------------------------|-------------------------|-----------------------|---------------------------|-------------------------|-------------------------|
| q value              | 4.43E-05             | 0.12939                | 0.003965               | 0.00032494             | 0.00032494       | 0.03588                | 0.14622                | 4.43E-05                | 4.43E-05              | 0.02189                   | 0.00053898              | 0.10191                 |
| residual q value     | 4.43E-05             | 0.12939                | 0.003965               | 0.00032494             | 1                | 0.03588                | 0.14622                | 4.43E-05                | 4.43E-05              | 0.02189                   | 0.00053898              | 0.10191                 |
| wide peak boundaries | chr1:168534-17100800 | chr4:14884836-15076917 | chr5:68856260-70096675 | chr6:27765466-27870329 | chr6:1-171115067 | chr8:59404889-59555610 | chr9:39010498-40513014 | chr11:65164168-65273902 | chr12:9446959-9605858 | chr15:102291831-102355571 | chr16:29321829-29641162 | chr17:39174123-39353070 |

**eTable 3.** List of specific amplified genes identified by GISTIC analysis in eTable 2.

| cytoband | 1p36.13 | 4p15.33   | 5q13.2  | 6p22.1    | 6p22.1         | 8q12.1 | 9p13.1    | 11q13.1     | 12p13.31  | 15q26.3 | 16p11.2   | 17q21.2   |
|----------|---------|-----------|---------|-----------|----------------|--------|-----------|-------------|-----------|---------|-----------|-----------|
|          | MST1P2  | CPEB2     | SMN1    | HIST1H1B  | hsa-mir-1913   | CYP7A1 | CNTNAP3   | hsa-mir-612 | DDX12P    | OR4F6   | SULT1A3   | KRTAP1-3  |
|          | MST1P9  | LOC441009 | SMN2    | HIST1H2AI | hsa-mir-1202   | SDCBP  | FAM74A1   | FRMD8       | LOC642846 |         | SLX1B     | KRTAP1-1  |
|          | NBPF1   |           | SERF1A  | HIST1H2AK | hsa-mir-1273c  | NSMAF  | ZNF658B   | NEAT1       |           |         | SLC7A5P1  | KRTAP4-6  |
|          | CROCCP2 |           | SMA4    | HIST1H2AJ | hsa-mir-3145   |        | FAM75A2   | MALAT1      |           |         | LOC388242 | KRTAP2-1  |
|          | ESPNP   |           | SMA5    | HIST1H2AL | hsa-mir-548a-2 |        | FAM75A1   | MIR612      |           |         | SNX29P2   | KRTAP4-12 |
|          | MIR3675 |           | GUSBP3  | HIST1H2AM | hsa-mir-588    |        | LOC653501 |             |           |         | LOC440354 | KRTAP1-5  |
|          |         |           | GTF2H2B | HIST1H2BL | hsa-mir-3144   |        |           |             |           |         | SULT1A4   | KRTAP4-4  |
|          |         |           | GTF2H2C | HIST1H2BN | hsa-mir-548b   |        |           |             |           |         | SLX1A     | KRTAP4-1  |
|          |         |           | SERF1B  | HIST1H2BM | hsa-mir-587    |        |           |             |           |         | BOLA2     | KRTAP4-5  |
|          |         |           | GTF2H2D | HIST1H2BO | hsa-mir-2113   |        |           |             |           |         | LOC606724 | KRTAP4-3  |
|          |         |           | GUSBP9  | HIST1H3I  | hsa-mir-4282   |        |           |             |           |         | BOLA2B    | KRTAP4-2  |

|  |  |  |              |          |                |  |  |  |  |  |               |           |
|--|--|--|--------------|----------|----------------|--|--|--|--|--|---------------|-----------|
|  |  |  | LOC100170939 | HIST1H3J | hsa-mir-30a    |  |  |  |  |  | SLX1A-SULT1A3 | KRTAP2-4  |
|  |  |  | LOC100272216 | HIST1H3H | hsa-mir-30c-2  |  |  |  |  |  | SLX1B-SULT1A4 | KRTAP4-11 |
|  |  |  |              | HIST1H4K | hsa-mir-548u   |  |  |  |  |  |               | KRTAP4-8  |
|  |  |  |              | HIST1H4J | hsa-mir-133b   |  |  |  |  |  |               | KRTAP2-2  |
|  |  |  |              | HIST1H4L | hsa-mir-586    |  |  |  |  |  |               | KRTAP9-1  |
|  |  |  |              |          | hsa-mir-1275   |  |  |  |  |  |               | LOC730755 |
|  |  |  |              |          | hsa-mir-219-1  |  |  |  |  |  |               | KRTAP4-9  |
|  |  |  |              |          | hsa-mir-1236   |  |  |  |  |  |               | KRTAP4-7  |
|  |  |  |              |          | hsa-mir-877    |  |  |  |  |  |               |           |
|  |  |  |              |          | hsa-mir-3143   |  |  |  |  |  |               |           |
|  |  |  |              |          | hsa-mir-548a-1 |  |  |  |  |  |               |           |
|  |  |  |              |          | ABCF1          |  |  |  |  |  |               |           |
|  |  |  |              |          | ACAT2          |  |  |  |  |  |               |           |
|  |  |  |              |          | CRISP1         |  |  |  |  |  |               |           |
|  |  |  |              |          | AGER           |  |  |  |  |  |               |           |
|  |  |  |              |          | AIF1           |  |  |  |  |  |               |           |
|  |  |  |              |          | AIM1           |  |  |  |  |  |               |           |
|  |  |  |              |          | AMD1           |  |  |  |  |  |               |           |
|  |  |  |              |          | ARG1           |  |  |  |  |  |               |           |
|  |  |  |              |          | ATP6V1G2       |  |  |  |  |  |               |           |
|  |  |  |              |          | BAI3           |  |  |  |  |  |               |           |
|  |  |  |              |          | BAK1           |  |  |  |  |  |               |           |
|  |  |  |              |          | BCKDHB         |  |  |  |  |  |               |           |
|  |  |  |              |          | CFB            |  |  |  |  |  |               |           |
|  |  |  |              |          | PRDM1          |  |  |  |  |  |               |           |
|  |  |  |              |          | BMP5           |  |  |  |  |  |               |           |
|  |  |  |              |          | BMP6           |  |  |  |  |  |               |           |
|  |  |  |              |          | DST            |  |  |  |  |  |               |           |
|  |  |  |              |          | BPHL           |  |  |  |  |  |               |           |
|  |  |  |              |          | BTN1A1         |  |  |  |  |  |               |           |
|  |  |  |              |          | BYSL           |  |  |  |  |  |               |           |
|  |  |  |              |          | C2             |  |  |  |  |  |               |           |
|  |  |  |              |          | C4A            |  |  |  |  |  |               |           |
|  |  |  |              |          | C4B            |  |  |  |  |  |               |           |
|  |  |  |              |          | DDR1           |  |  |  |  |  |               |           |
|  |  |  |              |          | RUNX2          |  |  |  |  |  |               |           |
|  |  |  |              |          | CCNC           |  |  |  |  |  |               |           |
|  |  |  |              |          | CCND3          |  |  |  |  |  |               |           |
|  |  |  |              |          | CDC5L          |  |  |  |  |  |               |           |
|  |  |  |              |          | CDKN1A         |  |  |  |  |  |               |           |
|  |  |  |              |          | CDSN           |  |  |  |  |  |               |           |
|  |  |  |              |          | CGA            |  |  |  |  |  |               |           |
|  |  |  |              |          | CLIC1          |  |  |  |  |  |               |           |
|  |  |  |              |          | CLPS           |  |  |  |  |  |               |           |
|  |  |  |              |          | CCR6           |  |  |  |  |  |               |           |
|  |  |  |              |          | CNR1           |  |  |  |  |  |               |           |
|  |  |  |              |          | COL9A1         |  |  |  |  |  |               |           |

|  |  |  |  |  |          |  |  |  |  |  |  |  |  |  |
|--|--|--|--|--|----------|--|--|--|--|--|--|--|--|--|
|  |  |  |  |  | COL10A1  |  |  |  |  |  |  |  |  |  |
|  |  |  |  |  | COL11A2  |  |  |  |  |  |  |  |  |  |
|  |  |  |  |  | COL12A1  |  |  |  |  |  |  |  |  |  |
|  |  |  |  |  | COL19A1  |  |  |  |  |  |  |  |  |  |
|  |  |  |  |  | COX7A2   |  |  |  |  |  |  |  |  |  |
|  |  |  |  |  | ATF6B    |  |  |  |  |  |  |  |  |  |
|  |  |  |  |  | MAPK14   |  |  |  |  |  |  |  |  |  |
|  |  |  |  |  | CSNK2B   |  |  |  |  |  |  |  |  |  |
|  |  |  |  |  | CTGF     |  |  |  |  |  |  |  |  |  |
|  |  |  |  |  | CYP21A2  |  |  |  |  |  |  |  |  |  |
|  |  |  |  |  | CYP21A1P |  |  |  |  |  |  |  |  |  |
|  |  |  |  |  | DAXX     |  |  |  |  |  |  |  |  |  |
|  |  |  |  |  | DNAH8    |  |  |  |  |  |  |  |  |  |
|  |  |  |  |  | DOM3Z    |  |  |  |  |  |  |  |  |  |
|  |  |  |  |  | DSP      |  |  |  |  |  |  |  |  |  |
|  |  |  |  |  | E2F3     |  |  |  |  |  |  |  |  |  |
|  |  |  |  |  | EDN1     |  |  |  |  |  |  |  |  |  |
|  |  |  |  |  | EEF1A1   |  |  |  |  |  |  |  |  |  |
|  |  |  |  |  | SERPINB1 |  |  |  |  |  |  |  |  |  |
|  |  |  |  |  | SLC29A1  |  |  |  |  |  |  |  |  |  |
|  |  |  |  |  | EPB41L2  |  |  |  |  |  |  |  |  |  |
|  |  |  |  |  | EPHA7    |  |  |  |  |  |  |  |  |  |
|  |  |  |  |  | EYA4     |  |  |  |  |  |  |  |  |  |
|  |  |  |  |  | ESR1     |  |  |  |  |  |  |  |  |  |
|  |  |  |  |  | F13A1    |  |  |  |  |  |  |  |  |  |
|  |  |  |  |  | FABP7    |  |  |  |  |  |  |  |  |  |
|  |  |  |  |  | FANCE    |  |  |  |  |  |  |  |  |  |
|  |  |  |  |  | FKBP5    |  |  |  |  |  |  |  |  |  |
|  |  |  |  |  | FOXF2    |  |  |  |  |  |  |  |  |  |
|  |  |  |  |  | FOXC1    |  |  |  |  |  |  |  |  |  |
|  |  |  |  |  | FOXO3    |  |  |  |  |  |  |  |  |  |
|  |  |  |  |  | FRK      |  |  |  |  |  |  |  |  |  |
|  |  |  |  |  | FUCA2    |  |  |  |  |  |  |  |  |  |
|  |  |  |  |  | FYN      |  |  |  |  |  |  |  |  |  |
|  |  |  |  |  | GABBR1   |  |  |  |  |  |  |  |  |  |
|  |  |  |  |  | GABRR1   |  |  |  |  |  |  |  |  |  |
|  |  |  |  |  | GABRR2   |  |  |  |  |  |  |  |  |  |
|  |  |  |  |  | GCNT2    |  |  |  |  |  |  |  |  |  |
|  |  |  |  |  | GJA1     |  |  |  |  |  |  |  |  |  |
|  |  |  |  |  | GCLC     |  |  |  |  |  |  |  |  |  |
|  |  |  |  |  | GLO1     |  |  |  |  |  |  |  |  |  |
|  |  |  |  |  | GLP1R    |  |  |  |  |  |  |  |  |  |
|  |  |  |  |  | GMDS     |  |  |  |  |  |  |  |  |  |
|  |  |  |  |  | GMPR     |  |  |  |  |  |  |  |  |  |
|  |  |  |  |  | GNL1     |  |  |  |  |  |  |  |  |  |
|  |  |  |  |  | GPLD1    |  |  |  |  |  |  |  |  |  |
|  |  |  |  |  | GPR6     |  |  |  |  |  |  |  |  |  |
|  |  |  |  |  | GPR31    |  |  |  |  |  |  |  |  |  |
|  |  |  |  |  | GPX5     |  |  |  |  |  |  |  |  |  |
|  |  |  |  |  | GRIK2    |  |  |  |  |  |  |  |  |  |

|  |  |  |  |  |           |  |  |  |  |  |  |  |  |  |
|--|--|--|--|--|-----------|--|--|--|--|--|--|--|--|--|
|  |  |  |  |  | GRM1      |  |  |  |  |  |  |  |  |  |
|  |  |  |  |  | GRM4      |  |  |  |  |  |  |  |  |  |
|  |  |  |  |  | GSTA1     |  |  |  |  |  |  |  |  |  |
|  |  |  |  |  | GSTA2     |  |  |  |  |  |  |  |  |  |
|  |  |  |  |  | GSTA3     |  |  |  |  |  |  |  |  |  |
|  |  |  |  |  | GSTA4     |  |  |  |  |  |  |  |  |  |
|  |  |  |  |  | GTF2H4    |  |  |  |  |  |  |  |  |  |
|  |  |  |  |  | GUCA1A    |  |  |  |  |  |  |  |  |  |
|  |  |  |  |  | GUCA1B    |  |  |  |  |  |  |  |  |  |
|  |  |  |  |  | HIST1H1C  |  |  |  |  |  |  |  |  |  |
|  |  |  |  |  | HIST1H1D  |  |  |  |  |  |  |  |  |  |
|  |  |  |  |  | HIST1H1E  |  |  |  |  |  |  |  |  |  |
|  |  |  |  |  | HIST1H1B  |  |  |  |  |  |  |  |  |  |
|  |  |  |  |  | HIST1H1T  |  |  |  |  |  |  |  |  |  |
|  |  |  |  |  | HIST1H2AE |  |  |  |  |  |  |  |  |  |
|  |  |  |  |  | HIST1H2AD |  |  |  |  |  |  |  |  |  |
|  |  |  |  |  | HIST1H2BD |  |  |  |  |  |  |  |  |  |
|  |  |  |  |  | HIST1H2BB |  |  |  |  |  |  |  |  |  |
|  |  |  |  |  | HIST1H1A  |  |  |  |  |  |  |  |  |  |
|  |  |  |  |  | HCRTR2    |  |  |  |  |  |  |  |  |  |
|  |  |  |  |  | HDAC2     |  |  |  |  |  |  |  |  |  |
|  |  |  |  |  | HFE       |  |  |  |  |  |  |  |  |  |
|  |  |  |  |  | HIVEP1    |  |  |  |  |  |  |  |  |  |
|  |  |  |  |  | HIVEP2    |  |  |  |  |  |  |  |  |  |
|  |  |  |  |  | HLA-A     |  |  |  |  |  |  |  |  |  |
|  |  |  |  |  | HLA-B     |  |  |  |  |  |  |  |  |  |
|  |  |  |  |  | HLA-C     |  |  |  |  |  |  |  |  |  |
|  |  |  |  |  | HLA-DMA   |  |  |  |  |  |  |  |  |  |
|  |  |  |  |  | HLA-DMB   |  |  |  |  |  |  |  |  |  |
|  |  |  |  |  | HLA-DOA   |  |  |  |  |  |  |  |  |  |
|  |  |  |  |  | HLA-DOB   |  |  |  |  |  |  |  |  |  |
|  |  |  |  |  | HLA-DPA1  |  |  |  |  |  |  |  |  |  |
|  |  |  |  |  | HLA-DPB1  |  |  |  |  |  |  |  |  |  |
|  |  |  |  |  | HLA-DPB2  |  |  |  |  |  |  |  |  |  |
|  |  |  |  |  | HLA-DQA1  |  |  |  |  |  |  |  |  |  |
|  |  |  |  |  | HLA-DQA2  |  |  |  |  |  |  |  |  |  |
|  |  |  |  |  | HLA-DQB1  |  |  |  |  |  |  |  |  |  |
|  |  |  |  |  | HLA-DQB2  |  |  |  |  |  |  |  |  |  |
|  |  |  |  |  | HLA-DRA   |  |  |  |  |  |  |  |  |  |
|  |  |  |  |  | HLA-DRB1  |  |  |  |  |  |  |  |  |  |
|  |  |  |  |  | HLA-DRB5  |  |  |  |  |  |  |  |  |  |
|  |  |  |  |  | HLA-DRB6  |  |  |  |  |  |  |  |  |  |
|  |  |  |  |  | HLA-E     |  |  |  |  |  |  |  |  |  |
|  |  |  |  |  | HLA-F     |  |  |  |  |  |  |  |  |  |
|  |  |  |  |  | HLA-G     |  |  |  |  |  |  |  |  |  |
|  |  |  |  |  | HLA-H     |  |  |  |  |  |  |  |  |  |
|  |  |  |  |  | HLA-J     |  |  |  |  |  |  |  |  |  |
|  |  |  |  |  | HLA-L     |  |  |  |  |  |  |  |  |  |
|  |  |  |  |  | HMGA1     |  |  |  |  |  |  |  |  |  |
|  |  |  |  |  | HSF2      |  |  |  |  |  |  |  |  |  |

|  |  |  |  |          |  |  |  |  |  |  |  |  |  |  |  |
|--|--|--|--|----------|--|--|--|--|--|--|--|--|--|--|--|
|  |  |  |  | HSPA1A   |  |  |  |  |  |  |  |  |  |  |  |
|  |  |  |  | HSPA1B   |  |  |  |  |  |  |  |  |  |  |  |
|  |  |  |  | HSPA1L   |  |  |  |  |  |  |  |  |  |  |  |
|  |  |  |  | HSP90AB1 |  |  |  |  |  |  |  |  |  |  |  |
|  |  |  |  | HTR1B    |  |  |  |  |  |  |  |  |  |  |  |
|  |  |  |  | HTR1E    |  |  |  |  |  |  |  |  |  |  |  |
|  |  |  |  | ID4      |  |  |  |  |  |  |  |  |  |  |  |
|  |  |  |  | IFNGR1   |  |  |  |  |  |  |  |  |  |  |  |
|  |  |  |  | IGF2R    |  |  |  |  |  |  |  |  |  |  |  |
|  |  |  |  | IL17A    |  |  |  |  |  |  |  |  |  |  |  |
|  |  |  |  | IMPG1    |  |  |  |  |  |  |  |  |  |  |  |
|  |  |  |  | IRF4     |  |  |  |  |  |  |  |  |  |  |  |
|  |  |  |  | ITPR3    |  |  |  |  |  |  |  |  |  |  |  |
|  |  |  |  | JARID2   |  |  |  |  |  |  |  |  |  |  |  |
|  |  |  |  | KIFC1    |  |  |  |  |  |  |  |  |  |  |  |
|  |  |  |  | KIF25    |  |  |  |  |  |  |  |  |  |  |  |
|  |  |  |  | KPNA5    |  |  |  |  |  |  |  |  |  |  |  |
|  |  |  |  | LAMA2    |  |  |  |  |  |  |  |  |  |  |  |
|  |  |  |  | LAMA4    |  |  |  |  |  |  |  |  |  |  |  |
|  |  |  |  | LPA      |  |  |  |  |  |  |  |  |  |  |  |
|  |  |  |  | LTA      |  |  |  |  |  |  |  |  |  |  |  |
|  |  |  |  | LTB      |  |  |  |  |  |  |  |  |  |  |  |
|  |  |  |  | MARCKS   |  |  |  |  |  |  |  |  |  |  |  |
|  |  |  |  | MAK      |  |  |  |  |  |  |  |  |  |  |  |
|  |  |  |  | MAN1A1   |  |  |  |  |  |  |  |  |  |  |  |
|  |  |  |  | MAS1     |  |  |  |  |  |  |  |  |  |  |  |
|  |  |  |  | MCM3     |  |  |  |  |  |  |  |  |  |  |  |
|  |  |  |  | MDF1     |  |  |  |  |  |  |  |  |  |  |  |
|  |  |  |  | ME1      |  |  |  |  |  |  |  |  |  |  |  |
|  |  |  |  | MEA1     |  |  |  |  |  |  |  |  |  |  |  |
|  |  |  |  | MAP3K4   |  |  |  |  |  |  |  |  |  |  |  |
|  |  |  |  | MAP3K5   |  |  |  |  |  |  |  |  |  |  |  |
|  |  |  |  | MEP1A    |  |  |  |  |  |  |  |  |  |  |  |
|  |  |  |  | MICB     |  |  |  |  |  |  |  |  |  |  |  |
|  |  |  |  | MLN      |  |  |  |  |  |  |  |  |  |  |  |
|  |  |  |  | MLLT4    |  |  |  |  |  |  |  |  |  |  |  |
|  |  |  |  | MOCS1    |  |  |  |  |  |  |  |  |  |  |  |
|  |  |  |  | MOG      |  |  |  |  |  |  |  |  |  |  |  |
|  |  |  |  | MSH5     |  |  |  |  |  |  |  |  |  |  |  |
|  |  |  |  | MUT      |  |  |  |  |  |  |  |  |  |  |  |
|  |  |  |  | MYB      |  |  |  |  |  |  |  |  |  |  |  |
|  |  |  |  | MYO6     |  |  |  |  |  |  |  |  |  |  |  |
|  |  |  |  | RPL10A   |  |  |  |  |  |  |  |  |  |  |  |
|  |  |  |  | NEDD9    |  |  |  |  |  |  |  |  |  |  |  |
|  |  |  |  | NEU1     |  |  |  |  |  |  |  |  |  |  |  |
|  |  |  |  | NFKBIE   |  |  |  |  |  |  |  |  |  |  |  |
|  |  |  |  | NFKBIL1  |  |  |  |  |  |  |  |  |  |  |  |
|  |  |  |  | NFYA     |  |  |  |  |  |  |  |  |  |  |  |
|  |  |  |  | NMBR     |  |  |  |  |  |  |  |  |  |  |  |
|  |  |  |  | NQO2     |  |  |  |  |  |  |  |  |  |  |  |



|  |  |  |  |  |          |  |  |  |  |  |  |  |  |
|--|--|--|--|--|----------|--|--|--|--|--|--|--|--|
|  |  |  |  |  | NOTCH4   |  |  |  |  |  |  |  |  |
|  |  |  |  |  | NT5E     |  |  |  |  |  |  |  |  |
|  |  |  |  |  | OPRM1    |  |  |  |  |  |  |  |  |
|  |  |  |  |  | PARK2    |  |  |  |  |  |  |  |  |
|  |  |  |  |  | PBX2     |  |  |  |  |  |  |  |  |
|  |  |  |  |  | PCMT1    |  |  |  |  |  |  |  |  |
|  |  |  |  |  | PDCD2    |  |  |  |  |  |  |  |  |
|  |  |  |  |  | ENPP1    |  |  |  |  |  |  |  |  |
|  |  |  |  |  | ENPP3    |  |  |  |  |  |  |  |  |
|  |  |  |  |  | PEX6     |  |  |  |  |  |  |  |  |
|  |  |  |  |  | PEX7     |  |  |  |  |  |  |  |  |
|  |  |  |  |  | PGC      |  |  |  |  |  |  |  |  |
|  |  |  |  |  | PGK2     |  |  |  |  |  |  |  |  |
|  |  |  |  |  | PGM3     |  |  |  |  |  |  |  |  |
|  |  |  |  |  | PHF1     |  |  |  |  |  |  |  |  |
|  |  |  |  |  | SERPINB6 |  |  |  |  |  |  |  |  |
|  |  |  |  |  | SERPINB9 |  |  |  |  |  |  |  |  |
|  |  |  |  |  | PIM1     |  |  |  |  |  |  |  |  |
|  |  |  |  |  | PKHD1    |  |  |  |  |  |  |  |  |
|  |  |  |  |  | PLAGL1   |  |  |  |  |  |  |  |  |
|  |  |  |  |  | PLG      |  |  |  |  |  |  |  |  |
|  |  |  |  |  | PLN      |  |  |  |  |  |  |  |  |
|  |  |  |  |  | POLH     |  |  |  |  |  |  |  |  |
|  |  |  |  |  | POU3F2   |  |  |  |  |  |  |  |  |
|  |  |  |  |  | POU5F1   |  |  |  |  |  |  |  |  |
|  |  |  |  |  | PPARD    |  |  |  |  |  |  |  |  |
|  |  |  |  |  | PPP1R10  |  |  |  |  |  |  |  |  |
|  |  |  |  |  | PPP2R5D  |  |  |  |  |  |  |  |  |
|  |  |  |  |  | PREP     |  |  |  |  |  |  |  |  |
|  |  |  |  |  | PRIM2    |  |  |  |  |  |  |  |  |
|  |  |  |  |  | PKIB     |  |  |  |  |  |  |  |  |
|  |  |  |  |  | MAPK13   |  |  |  |  |  |  |  |  |
|  |  |  |  |  | PRL      |  |  |  |  |  |  |  |  |
|  |  |  |  |  | PSMB1    |  |  |  |  |  |  |  |  |
|  |  |  |  |  | PSMB8    |  |  |  |  |  |  |  |  |
|  |  |  |  |  | PSMB9    |  |  |  |  |  |  |  |  |
|  |  |  |  |  | PTK7     |  |  |  |  |  |  |  |  |
|  |  |  |  |  | PTPRK    |  |  |  |  |  |  |  |  |
|  |  |  |  |  | RGL2     |  |  |  |  |  |  |  |  |
|  |  |  |  |  | PRPH2    |  |  |  |  |  |  |  |  |
|  |  |  |  |  | REV3L    |  |  |  |  |  |  |  |  |
|  |  |  |  |  | TRIM27   |  |  |  |  |  |  |  |  |
|  |  |  |  |  | RHAG     |  |  |  |  |  |  |  |  |
|  |  |  |  |  | RING1    |  |  |  |  |  |  |  |  |
|  |  |  |  |  | BRD2     |  |  |  |  |  |  |  |  |
|  |  |  |  |  | RNF5     |  |  |  |  |  |  |  |  |
|  |  |  |  |  | RNY4     |  |  |  |  |  |  |  |  |
|  |  |  |  |  | ROS1     |  |  |  |  |  |  |  |  |
|  |  |  |  |  | RPS6KA2  |  |  |  |  |  |  |  |  |
|  |  |  |  |  | RPS10    |  |  |  |  |  |  |  |  |

|  |  |  |  |         |  |  |  |  |  |  |  |  |
|--|--|--|--|---------|--|--|--|--|--|--|--|--|
|  |  |  |  | RPS12   |  |  |  |  |  |  |  |  |
|  |  |  |  | RPS18   |  |  |  |  |  |  |  |  |
|  |  |  |  | RREB1   |  |  |  |  |  |  |  |  |
|  |  |  |  | RXRB    |  |  |  |  |  |  |  |  |
|  |  |  |  | VPS52   |  |  |  |  |  |  |  |  |
|  |  |  |  | ATXN1   |  |  |  |  |  |  |  |  |
|  |  |  |  | SRSF3   |  |  |  |  |  |  |  |  |
|  |  |  |  | SGK1    |  |  |  |  |  |  |  |  |
|  |  |  |  | SIM1    |  |  |  |  |  |  |  |  |
|  |  |  |  | SKIV2L  |  |  |  |  |  |  |  |  |
|  |  |  |  | SLC17A1 |  |  |  |  |  |  |  |  |
|  |  |  |  | SLC22A1 |  |  |  |  |  |  |  |  |
|  |  |  |  | SLC22A3 |  |  |  |  |  |  |  |  |
|  |  |  |  | SLC22A2 |  |  |  |  |  |  |  |  |
|  |  |  |  | SMPD2   |  |  |  |  |  |  |  |  |
|  |  |  |  | SNRPC   |  |  |  |  |  |  |  |  |
|  |  |  |  | SOD2    |  |  |  |  |  |  |  |  |
|  |  |  |  | SOX4    |  |  |  |  |  |  |  |  |
|  |  |  |  | SRF     |  |  |  |  |  |  |  |  |
|  |  |  |  | SRPK1   |  |  |  |  |  |  |  |  |
|  |  |  |  | SSR1    |  |  |  |  |  |  |  |  |
|  |  |  |  | ELOVL4  |  |  |  |  |  |  |  |  |
|  |  |  |  | T       |  |  |  |  |  |  |  |  |
|  |  |  |  | TAF11   |  |  |  |  |  |  |  |  |
|  |  |  |  | MAP3K7  |  |  |  |  |  |  |  |  |
|  |  |  |  | TAP1    |  |  |  |  |  |  |  |  |
|  |  |  |  | TAP2    |  |  |  |  |  |  |  |  |
|  |  |  |  | TAPBP   |  |  |  |  |  |  |  |  |
|  |  |  |  | TBCC    |  |  |  |  |  |  |  |  |
|  |  |  |  | TBP     |  |  |  |  |  |  |  |  |
|  |  |  |  | TCF19   |  |  |  |  |  |  |  |  |
|  |  |  |  | TCF21   |  |  |  |  |  |  |  |  |
|  |  |  |  | TCP1    |  |  |  |  |  |  |  |  |
|  |  |  |  | TCP10   |  |  |  |  |  |  |  |  |
|  |  |  |  | TCP11   |  |  |  |  |  |  |  |  |
|  |  |  |  | TCTE3   |  |  |  |  |  |  |  |  |
|  |  |  |  | PPP1R11 |  |  |  |  |  |  |  |  |
|  |  |  |  | DYNLT1  |  |  |  |  |  |  |  |  |
|  |  |  |  | TEAD3   |  |  |  |  |  |  |  |  |
|  |  |  |  | TFAP2A  |  |  |  |  |  |  |  |  |
|  |  |  |  | TFAP2B  |  |  |  |  |  |  |  |  |
|  |  |  |  | THBS2   |  |  |  |  |  |  |  |  |
|  |  |  |  | NR2E1   |  |  |  |  |  |  |  |  |
|  |  |  |  | TNF     |  |  |  |  |  |  |  |  |
|  |  |  |  | TNFAIP3 |  |  |  |  |  |  |  |  |
|  |  |  |  | TNXA    |  |  |  |  |  |  |  |  |
|  |  |  |  | TNXB    |  |  |  |  |  |  |  |  |
|  |  |  |  | TPBG    |  |  |  |  |  |  |  |  |
|  |  |  |  | TPD52L1 |  |  |  |  |  |  |  |  |
|  |  |  |  | TPMT    |  |  |  |  |  |  |  |  |

|  |  |  |  |  |  |           |  |  |  |  |  |  |  |  |
|--|--|--|--|--|--|-----------|--|--|--|--|--|--|--|--|
|  |  |  |  |  |  | CRISP2    |  |  |  |  |  |  |  |  |
|  |  |  |  |  |  | TSPYL1    |  |  |  |  |  |  |  |  |
|  |  |  |  |  |  | TTK       |  |  |  |  |  |  |  |  |
|  |  |  |  |  |  | TUBB2A    |  |  |  |  |  |  |  |  |
|  |  |  |  |  |  | TULP1     |  |  |  |  |  |  |  |  |
|  |  |  |  |  |  | UTRN      |  |  |  |  |  |  |  |  |
|  |  |  |  |  |  | VAR5      |  |  |  |  |  |  |  |  |
|  |  |  |  |  |  | VEGFA     |  |  |  |  |  |  |  |  |
|  |  |  |  |  |  | EZR       |  |  |  |  |  |  |  |  |
|  |  |  |  |  |  | VIP       |  |  |  |  |  |  |  |  |
|  |  |  |  |  |  | ZNF76     |  |  |  |  |  |  |  |  |
|  |  |  |  |  |  | ZNF165    |  |  |  |  |  |  |  |  |
|  |  |  |  |  |  | TRIM26    |  |  |  |  |  |  |  |  |
|  |  |  |  |  |  | ZNF184    |  |  |  |  |  |  |  |  |
|  |  |  |  |  |  | ZNF187    |  |  |  |  |  |  |  |  |
|  |  |  |  |  |  | ZNF192    |  |  |  |  |  |  |  |  |
|  |  |  |  |  |  | ZNF193    |  |  |  |  |  |  |  |  |
|  |  |  |  |  |  | ZNF204P   |  |  |  |  |  |  |  |  |
|  |  |  |  |  |  | PTP4A1    |  |  |  |  |  |  |  |  |
|  |  |  |  |  |  | DEK       |  |  |  |  |  |  |  |  |
|  |  |  |  |  |  | ALDH5A1   |  |  |  |  |  |  |  |  |
|  |  |  |  |  |  | PRRC2A    |  |  |  |  |  |  |  |  |
|  |  |  |  |  |  | BAG6      |  |  |  |  |  |  |  |  |
|  |  |  |  |  |  | GPANK1    |  |  |  |  |  |  |  |  |
|  |  |  |  |  |  | DDX39B    |  |  |  |  |  |  |  |  |
|  |  |  |  |  |  | ABHD16A   |  |  |  |  |  |  |  |  |
|  |  |  |  |  |  | SLC39A7   |  |  |  |  |  |  |  |  |
|  |  |  |  |  |  | HSD17B8   |  |  |  |  |  |  |  |  |
|  |  |  |  |  |  | OR2H2     |  |  |  |  |  |  |  |  |
|  |  |  |  |  |  | RDBP      |  |  |  |  |  |  |  |  |
|  |  |  |  |  |  | LST1      |  |  |  |  |  |  |  |  |
|  |  |  |  |  |  | PLA2G7    |  |  |  |  |  |  |  |  |
|  |  |  |  |  |  | TFEB      |  |  |  |  |  |  |  |  |
|  |  |  |  |  |  | STL       |  |  |  |  |  |  |  |  |
|  |  |  |  |  |  | EPM2A     |  |  |  |  |  |  |  |  |
|  |  |  |  |  |  | HIST1H4I  |  |  |  |  |  |  |  |  |
|  |  |  |  |  |  | HIST1H2AI |  |  |  |  |  |  |  |  |
|  |  |  |  |  |  | HIST1H2AK |  |  |  |  |  |  |  |  |
|  |  |  |  |  |  | HIST1H2AJ |  |  |  |  |  |  |  |  |
|  |  |  |  |  |  | HIST1H2AL |  |  |  |  |  |  |  |  |
|  |  |  |  |  |  | HIST1H2AC |  |  |  |  |  |  |  |  |
|  |  |  |  |  |  | HIST1H2AB |  |  |  |  |  |  |  |  |
|  |  |  |  |  |  | HIST1H2AM |  |  |  |  |  |  |  |  |
|  |  |  |  |  |  | HIST1H2BG |  |  |  |  |  |  |  |  |
|  |  |  |  |  |  | HIST1H2BL |  |  |  |  |  |  |  |  |
|  |  |  |  |  |  | HIST1H2BN |  |  |  |  |  |  |  |  |
|  |  |  |  |  |  | HIST1H2BM |  |  |  |  |  |  |  |  |
|  |  |  |  |  |  | HIST1H2BF |  |  |  |  |  |  |  |  |
|  |  |  |  |  |  | HIST1H2BE |  |  |  |  |  |  |  |  |
|  |  |  |  |  |  | HIST1H2BH |  |  |  |  |  |  |  |  |

|  |  |  |  |           |  |  |  |  |  |  |  |  |  |
|--|--|--|--|-----------|--|--|--|--|--|--|--|--|--|
|  |  |  |  | HIST1H2BI |  |  |  |  |  |  |  |  |  |
|  |  |  |  | HIST1H2BC |  |  |  |  |  |  |  |  |  |
|  |  |  |  | HIST1H2BO |  |  |  |  |  |  |  |  |  |
|  |  |  |  | HIST1H3A  |  |  |  |  |  |  |  |  |  |
|  |  |  |  | HIST1H3D  |  |  |  |  |  |  |  |  |  |
|  |  |  |  | HIST1H3C  |  |  |  |  |  |  |  |  |  |
|  |  |  |  | HIST1H3E  |  |  |  |  |  |  |  |  |  |
|  |  |  |  | HIST1H3I  |  |  |  |  |  |  |  |  |  |
|  |  |  |  | HIST1H3G  |  |  |  |  |  |  |  |  |  |
|  |  |  |  | HIST1H3J  |  |  |  |  |  |  |  |  |  |
|  |  |  |  | HIST1H3H  |  |  |  |  |  |  |  |  |  |
|  |  |  |  | HIST1H3B  |  |  |  |  |  |  |  |  |  |
|  |  |  |  | HIST1H4A  |  |  |  |  |  |  |  |  |  |
|  |  |  |  | HIST1H4D  |  |  |  |  |  |  |  |  |  |
|  |  |  |  | HIST1H4F  |  |  |  |  |  |  |  |  |  |
|  |  |  |  | HIST1H4K  |  |  |  |  |  |  |  |  |  |
|  |  |  |  | HIST1H4J  |  |  |  |  |  |  |  |  |  |
|  |  |  |  | HIST1H4C  |  |  |  |  |  |  |  |  |  |
|  |  |  |  | HIST1H4H  |  |  |  |  |  |  |  |  |  |
|  |  |  |  | HIST1H4B  |  |  |  |  |  |  |  |  |  |
|  |  |  |  | HIST1H4E  |  |  |  |  |  |  |  |  |  |
|  |  |  |  | HIST1H4L  |  |  |  |  |  |  |  |  |  |
|  |  |  |  | HIST1H4G  |  |  |  |  |  |  |  |  |  |
|  |  |  |  | STX7      |  |  |  |  |  |  |  |  |  |
|  |  |  |  | CMAHP     |  |  |  |  |  |  |  |  |  |
|  |  |  |  | DHX16     |  |  |  |  |  |  |  |  |  |
|  |  |  |  | SUPT3H    |  |  |  |  |  |  |  |  |  |
|  |  |  |  | PEX3      |  |  |  |  |  |  |  |  |  |
|  |  |  |  | GCM1      |  |  |  |  |  |  |  |  |  |
|  |  |  |  | DDO       |  |  |  |  |  |  |  |  |  |
|  |  |  |  | RNASET2   |  |  |  |  |  |  |  |  |  |
|  |  |  |  | KCNK5     |  |  |  |  |  |  |  |  |  |
|  |  |  |  | STX11     |  |  |  |  |  |  |  |  |  |
|  |  |  |  | B3GALT4   |  |  |  |  |  |  |  |  |  |
|  |  |  |  | SNX3      |  |  |  |  |  |  |  |  |  |
|  |  |  |  | RNGTT     |  |  |  |  |  |  |  |  |  |
|  |  |  |  | RIPK1     |  |  |  |  |  |  |  |  |  |
|  |  |  |  | CD164     |  |  |  |  |  |  |  |  |  |
|  |  |  |  | SYNGAP1   |  |  |  |  |  |  |  |  |  |
|  |  |  |  | WISP3     |  |  |  |  |  |  |  |  |  |
|  |  |  |  | STK19     |  |  |  |  |  |  |  |  |  |
|  |  |  |  | IER3      |  |  |  |  |  |  |  |  |  |
|  |  |  |  | SYNJ2     |  |  |  |  |  |  |  |  |  |
|  |  |  |  | VNN2      |  |  |  |  |  |  |  |  |  |
|  |  |  |  | VNN1      |  |  |  |  |  |  |  |  |  |
|  |  |  |  | PRPF4B    |  |  |  |  |  |  |  |  |  |
|  |  |  |  | WASF1     |  |  |  |  |  |  |  |  |  |
|  |  |  |  | HIST1H3F  |  |  |  |  |  |  |  |  |  |
|  |  |  |  | HIST1H2AG |  |  |  |  |  |  |  |  |  |
|  |  |  |  | HIST1H2BJ |  |  |  |  |  |  |  |  |  |

|  |  |  |  |  |          |  |  |  |  |  |  |  |  |
|--|--|--|--|--|----------|--|--|--|--|--|--|--|--|
|  |  |  |  |  | RNF8     |  |  |  |  |  |  |  |  |
|  |  |  |  |  | TAAR5    |  |  |  |  |  |  |  |  |
|  |  |  |  |  | MAP7     |  |  |  |  |  |  |  |  |
|  |  |  |  |  | TBX18    |  |  |  |  |  |  |  |  |
|  |  |  |  |  | LATS1    |  |  |  |  |  |  |  |  |
|  |  |  |  |  | GCM2     |  |  |  |  |  |  |  |  |
|  |  |  |  |  | WDR46    |  |  |  |  |  |  |  |  |
|  |  |  |  |  | ZBTB22   |  |  |  |  |  |  |  |  |
|  |  |  |  |  | TAAR2    |  |  |  |  |  |  |  |  |
|  |  |  |  |  | TAAR3    |  |  |  |  |  |  |  |  |
|  |  |  |  |  | CD83     |  |  |  |  |  |  |  |  |
|  |  |  |  |  | HMG3     |  |  |  |  |  |  |  |  |
|  |  |  |  |  | PPT2     |  |  |  |  |  |  |  |  |
|  |  |  |  |  | CDYL     |  |  |  |  |  |  |  |  |
|  |  |  |  |  | NCR2     |  |  |  |  |  |  |  |  |
|  |  |  |  |  | MED23    |  |  |  |  |  |  |  |  |
|  |  |  |  |  | QKI      |  |  |  |  |  |  |  |  |
|  |  |  |  |  | LY86     |  |  |  |  |  |  |  |  |
|  |  |  |  |  | FHL5     |  |  |  |  |  |  |  |  |
|  |  |  |  |  | AKAP7    |  |  |  |  |  |  |  |  |
|  |  |  |  |  | ATG5     |  |  |  |  |  |  |  |  |
|  |  |  |  |  | MED20    |  |  |  |  |  |  |  |  |
|  |  |  |  |  | SLC25A27 |  |  |  |  |  |  |  |  |
|  |  |  |  |  | TBPL1    |  |  |  |  |  |  |  |  |
|  |  |  |  |  | EEF1E1   |  |  |  |  |  |  |  |  |
|  |  |  |  |  | BAG2     |  |  |  |  |  |  |  |  |
|  |  |  |  |  | POLR1C   |  |  |  |  |  |  |  |  |
|  |  |  |  |  | MAD2L1BP |  |  |  |  |  |  |  |  |
|  |  |  |  |  | WTAP     |  |  |  |  |  |  |  |  |
|  |  |  |  |  | AKAP12   |  |  |  |  |  |  |  |  |
|  |  |  |  |  | MDC1     |  |  |  |  |  |  |  |  |
|  |  |  |  |  | TRAM2    |  |  |  |  |  |  |  |  |
|  |  |  |  |  | KIAA0408 |  |  |  |  |  |  |  |  |
|  |  |  |  |  | PHACTR2  |  |  |  |  |  |  |  |  |
|  |  |  |  |  | FAM65B   |  |  |  |  |  |  |  |  |
|  |  |  |  |  | ZSCAN12  |  |  |  |  |  |  |  |  |
|  |  |  |  |  | BCLAF1   |  |  |  |  |  |  |  |  |
|  |  |  |  |  | CUL7     |  |  |  |  |  |  |  |  |
|  |  |  |  |  | ZBTB24   |  |  |  |  |  |  |  |  |
|  |  |  |  |  | KIAA0319 |  |  |  |  |  |  |  |  |
|  |  |  |  |  | SNAP91   |  |  |  |  |  |  |  |  |
|  |  |  |  |  | FIG4     |  |  |  |  |  |  |  |  |
|  |  |  |  |  | NUP153   |  |  |  |  |  |  |  |  |
|  |  |  |  |  | CASP8AP2 |  |  |  |  |  |  |  |  |
|  |  |  |  |  | RANBP9   |  |  |  |  |  |  |  |  |
|  |  |  |  |  | SLC17A4  |  |  |  |  |  |  |  |  |
|  |  |  |  |  | UST      |  |  |  |  |  |  |  |  |
|  |  |  |  |  | TRIM10   |  |  |  |  |  |  |  |  |
|  |  |  |  |  | FLOT1    |  |  |  |  |  |  |  |  |
|  |  |  |  |  | RCAN2    |  |  |  |  |  |  |  |  |

|  |  |  |  |  |          |  |  |  |  |  |  |  |
|--|--|--|--|--|----------|--|--|--|--|--|--|--|
|  |  |  |  |  | SLC17A2  |  |  |  |  |  |  |  |
|  |  |  |  |  | HCG9     |  |  |  |  |  |  |  |
|  |  |  |  |  | PRSS16   |  |  |  |  |  |  |  |
|  |  |  |  |  | CRISP3   |  |  |  |  |  |  |  |
|  |  |  |  |  | TRDN     |  |  |  |  |  |  |  |
|  |  |  |  |  | CITED2   |  |  |  |  |  |  |  |
|  |  |  |  |  | BTN3A3   |  |  |  |  |  |  |  |
|  |  |  |  |  | BTN2A2   |  |  |  |  |  |  |  |
|  |  |  |  |  | ECI2     |  |  |  |  |  |  |  |
|  |  |  |  |  | PFDN6    |  |  |  |  |  |  |  |
|  |  |  |  |  | HMGN4    |  |  |  |  |  |  |  |
|  |  |  |  |  | TRIM38   |  |  |  |  |  |  |  |
|  |  |  |  |  | CAP2     |  |  |  |  |  |  |  |
|  |  |  |  |  | SYNCRIP  |  |  |  |  |  |  |  |
|  |  |  |  |  | UBD      |  |  |  |  |  |  |  |
|  |  |  |  |  | AGPAT1   |  |  |  |  |  |  |  |
|  |  |  |  |  | SLC35A1  |  |  |  |  |  |  |  |
|  |  |  |  |  | SCGN     |  |  |  |  |  |  |  |
|  |  |  |  |  | C6orf108 |  |  |  |  |  |  |  |
|  |  |  |  |  | C6orf10  |  |  |  |  |  |  |  |
|  |  |  |  |  | FARS2    |  |  |  |  |  |  |  |
|  |  |  |  |  | FUT9     |  |  |  |  |  |  |  |
|  |  |  |  |  | CNPY3    |  |  |  |  |  |  |  |
|  |  |  |  |  | TRAF3IP2 |  |  |  |  |  |  |  |
|  |  |  |  |  | HBS1L    |  |  |  |  |  |  |  |
|  |  |  |  |  | SLC17A3  |  |  |  |  |  |  |  |
|  |  |  |  |  | RPP40    |  |  |  |  |  |  |  |
|  |  |  |  |  | FRS3     |  |  |  |  |  |  |  |
|  |  |  |  |  | PDE10A   |  |  |  |  |  |  |  |
|  |  |  |  |  | SLC22A7  |  |  |  |  |  |  |  |
|  |  |  |  |  | HCP5     |  |  |  |  |  |  |  |
|  |  |  |  |  | EHMT2    |  |  |  |  |  |  |  |
|  |  |  |  |  | SMPDL3A  |  |  |  |  |  |  |  |
|  |  |  |  |  | APOBEC2  |  |  |  |  |  |  |  |
|  |  |  |  |  | PNRC1    |  |  |  |  |  |  |  |
|  |  |  |  |  | ASCC3    |  |  |  |  |  |  |  |
|  |  |  |  |  | RAB32    |  |  |  |  |  |  |  |
|  |  |  |  |  | TRIM31   |  |  |  |  |  |  |  |
|  |  |  |  |  | KATNA1   |  |  |  |  |  |  |  |
|  |  |  |  |  | FGFR1OP  |  |  |  |  |  |  |  |
|  |  |  |  |  | BTN3A2   |  |  |  |  |  |  |  |
|  |  |  |  |  | BTN3A1   |  |  |  |  |  |  |  |
|  |  |  |  |  | BTN2A1   |  |  |  |  |  |  |  |
|  |  |  |  |  | CAPN11   |  |  |  |  |  |  |  |
|  |  |  |  |  | BVES     |  |  |  |  |  |  |  |
|  |  |  |  |  | NUDT3    |  |  |  |  |  |  |  |
|  |  |  |  |  | SEC63    |  |  |  |  |  |  |  |
|  |  |  |  |  | NRM      |  |  |  |  |  |  |  |
|  |  |  |  |  | STK38    |  |  |  |  |  |  |  |
|  |  |  |  |  | SCAF8    |  |  |  |  |  |  |  |



|  |  |  |  |  |          |  |  |  |  |  |  |  |  |  |
|--|--|--|--|--|----------|--|--|--|--|--|--|--|--|--|
|  |  |  |  |  | SLC17A5  |  |  |  |  |  |  |  |  |  |
|  |  |  |  |  | OR12D2   |  |  |  |  |  |  |  |  |  |
|  |  |  |  |  | OR11A1   |  |  |  |  |  |  |  |  |  |
|  |  |  |  |  | RGS17    |  |  |  |  |  |  |  |  |  |
|  |  |  |  |  | OR2W1    |  |  |  |  |  |  |  |  |  |
|  |  |  |  |  | OR2J2    |  |  |  |  |  |  |  |  |  |
|  |  |  |  |  | OR2H1    |  |  |  |  |  |  |  |  |  |
|  |  |  |  |  | SNORD52  |  |  |  |  |  |  |  |  |  |
|  |  |  |  |  | SNORD50A |  |  |  |  |  |  |  |  |  |
|  |  |  |  |  | SNORD48  |  |  |  |  |  |  |  |  |  |
|  |  |  |  |  | PDE7B    |  |  |  |  |  |  |  |  |  |
|  |  |  |  |  | FILIP1   |  |  |  |  |  |  |  |  |  |
|  |  |  |  |  | BRPF3    |  |  |  |  |  |  |  |  |  |
|  |  |  |  |  | GNMT     |  |  |  |  |  |  |  |  |  |
|  |  |  |  |  | TNFRSF21 |  |  |  |  |  |  |  |  |  |
|  |  |  |  |  | SESN1    |  |  |  |  |  |  |  |  |  |
|  |  |  |  |  | TINAG    |  |  |  |  |  |  |  |  |  |
|  |  |  |  |  | DLL1     |  |  |  |  |  |  |  |  |  |
|  |  |  |  |  | OSTM1    |  |  |  |  |  |  |  |  |  |
|  |  |  |  |  | MRPS18B  |  |  |  |  |  |  |  |  |  |
|  |  |  |  |  | TMEM14A  |  |  |  |  |  |  |  |  |  |
|  |  |  |  |  | MRPL18   |  |  |  |  |  |  |  |  |  |
|  |  |  |  |  | NDUFAF4  |  |  |  |  |  |  |  |  |  |
|  |  |  |  |  | C6orf15  |  |  |  |  |  |  |  |  |  |
|  |  |  |  |  | MYLIP    |  |  |  |  |  |  |  |  |  |
|  |  |  |  |  | ABT1     |  |  |  |  |  |  |  |  |  |
|  |  |  |  |  | DSE      |  |  |  |  |  |  |  |  |  |
|  |  |  |  |  | PRICKLE4 |  |  |  |  |  |  |  |  |  |
|  |  |  |  |  | PACSIN1  |  |  |  |  |  |  |  |  |  |
|  |  |  |  |  | ZNRD1    |  |  |  |  |  |  |  |  |  |
|  |  |  |  |  | CLDN20   |  |  |  |  |  |  |  |  |  |
|  |  |  |  |  | NOX3     |  |  |  |  |  |  |  |  |  |
|  |  |  |  |  | DEF6     |  |  |  |  |  |  |  |  |  |
|  |  |  |  |  | C6orf48  |  |  |  |  |  |  |  |  |  |
|  |  |  |  |  | SLC35B3  |  |  |  |  |  |  |  |  |  |
|  |  |  |  |  | HDDC2    |  |  |  |  |  |  |  |  |  |
|  |  |  |  |  | GMNN     |  |  |  |  |  |  |  |  |  |
|  |  |  |  |  | MRPL2    |  |  |  |  |  |  |  |  |  |
|  |  |  |  |  | TFB1M    |  |  |  |  |  |  |  |  |  |
|  |  |  |  |  | CYB5R4   |  |  |  |  |  |  |  |  |  |
|  |  |  |  |  | TUBE1    |  |  |  |  |  |  |  |  |  |
|  |  |  |  |  | C6orf203 |  |  |  |  |  |  |  |  |  |
|  |  |  |  |  | TBC1D7   |  |  |  |  |  |  |  |  |  |
|  |  |  |  |  | NRN1     |  |  |  |  |  |  |  |  |  |
|  |  |  |  |  | CYP39A1  |  |  |  |  |  |  |  |  |  |
|  |  |  |  |  | CDC40    |  |  |  |  |  |  |  |  |  |
|  |  |  |  |  | RWDD1    |  |  |  |  |  |  |  |  |  |
|  |  |  |  |  | AIG1     |  |  |  |  |  |  |  |  |  |
|  |  |  |  |  | NOL7     |  |  |  |  |  |  |  |  |  |
|  |  |  |  |  | SNX9     |  |  |  |  |  |  |  |  |  |



|  |  |  |  |  |             |  |  |  |  |  |  |  |  |
|--|--|--|--|--|-------------|--|--|--|--|--|--|--|--|
|  |  |  |  |  | FAM8A1      |  |  |  |  |  |  |  |  |
|  |  |  |  |  | UBE2J1      |  |  |  |  |  |  |  |  |
|  |  |  |  |  | DCDC2       |  |  |  |  |  |  |  |  |
|  |  |  |  |  | ETV7        |  |  |  |  |  |  |  |  |
|  |  |  |  |  | TMEM14C     |  |  |  |  |  |  |  |  |
|  |  |  |  |  | VTA1        |  |  |  |  |  |  |  |  |
|  |  |  |  |  | LGSN        |  |  |  |  |  |  |  |  |
|  |  |  |  |  | TDP2        |  |  |  |  |  |  |  |  |
|  |  |  |  |  | CUTA        |  |  |  |  |  |  |  |  |
|  |  |  |  |  | PPIL1       |  |  |  |  |  |  |  |  |
|  |  |  |  |  | BRP44L      |  |  |  |  |  |  |  |  |
|  |  |  |  |  | HECA        |  |  |  |  |  |  |  |  |
|  |  |  |  |  | RAB23       |  |  |  |  |  |  |  |  |
|  |  |  |  |  | COQ3        |  |  |  |  |  |  |  |  |
|  |  |  |  |  | CLIC5       |  |  |  |  |  |  |  |  |
|  |  |  |  |  | IL20RA      |  |  |  |  |  |  |  |  |
|  |  |  |  |  | TREM2       |  |  |  |  |  |  |  |  |
|  |  |  |  |  | TREM1       |  |  |  |  |  |  |  |  |
|  |  |  |  |  | UNC93A      |  |  |  |  |  |  |  |  |
|  |  |  |  |  | HCG4        |  |  |  |  |  |  |  |  |
|  |  |  |  |  | GFOD1       |  |  |  |  |  |  |  |  |
|  |  |  |  |  | HMGCLL1     |  |  |  |  |  |  |  |  |
|  |  |  |  |  | MTRF1L      |  |  |  |  |  |  |  |  |
|  |  |  |  |  | CCHCR1      |  |  |  |  |  |  |  |  |
|  |  |  |  |  | GTPBP2      |  |  |  |  |  |  |  |  |
|  |  |  |  |  | BTN2A3P     |  |  |  |  |  |  |  |  |
|  |  |  |  |  | AHI1        |  |  |  |  |  |  |  |  |
|  |  |  |  |  | UHRF1BP1    |  |  |  |  |  |  |  |  |
|  |  |  |  |  | ELOVL2      |  |  |  |  |  |  |  |  |
|  |  |  |  |  | CDKAL1      |  |  |  |  |  |  |  |  |
|  |  |  |  |  | PAK1IP1     |  |  |  |  |  |  |  |  |
|  |  |  |  |  | RMND1       |  |  |  |  |  |  |  |  |
|  |  |  |  |  | PHIP        |  |  |  |  |  |  |  |  |
|  |  |  |  |  | SOBP        |  |  |  |  |  |  |  |  |
|  |  |  |  |  | AKIRIN2     |  |  |  |  |  |  |  |  |
|  |  |  |  |  | CENPQ       |  |  |  |  |  |  |  |  |
|  |  |  |  |  | MRPS18A     |  |  |  |  |  |  |  |  |
|  |  |  |  |  | MRPS10      |  |  |  |  |  |  |  |  |
|  |  |  |  |  | LRRC1       |  |  |  |  |  |  |  |  |
|  |  |  |  |  | PHF10       |  |  |  |  |  |  |  |  |
|  |  |  |  |  | QRSL1       |  |  |  |  |  |  |  |  |
|  |  |  |  |  | VNN3        |  |  |  |  |  |  |  |  |
|  |  |  |  |  | TMEM63B     |  |  |  |  |  |  |  |  |
|  |  |  |  |  | AKIRIN2-AS1 |  |  |  |  |  |  |  |  |
|  |  |  |  |  | DDX43       |  |  |  |  |  |  |  |  |
|  |  |  |  |  | FAM46A      |  |  |  |  |  |  |  |  |
|  |  |  |  |  | LRRC16A     |  |  |  |  |  |  |  |  |
|  |  |  |  |  | TBC1D22B    |  |  |  |  |  |  |  |  |
|  |  |  |  |  | TMEM30A     |  |  |  |  |  |  |  |  |
|  |  |  |  |  | EXOC2       |  |  |  |  |  |  |  |  |

|  |  |  |  |  |          |  |  |  |  |  |  |  |  |  |
|--|--|--|--|--|----------|--|--|--|--|--|--|--|--|--|
|  |  |  |  |  | SAYSD1   |  |  |  |  |  |  |  |  |  |
|  |  |  |  |  | C6orf70  |  |  |  |  |  |  |  |  |  |
|  |  |  |  |  | LMBRD1   |  |  |  |  |  |  |  |  |  |
|  |  |  |  |  | TRERF1   |  |  |  |  |  |  |  |  |  |
|  |  |  |  |  | ACOT13   |  |  |  |  |  |  |  |  |  |
|  |  |  |  |  | ECHDC1   |  |  |  |  |  |  |  |  |  |
|  |  |  |  |  | APOM     |  |  |  |  |  |  |  |  |  |
|  |  |  |  |  | BTNL2    |  |  |  |  |  |  |  |  |  |
|  |  |  |  |  | KCNQ5    |  |  |  |  |  |  |  |  |  |
|  |  |  |  |  | TRIM39   |  |  |  |  |  |  |  |  |  |
|  |  |  |  |  | AGPAT4   |  |  |  |  |  |  |  |  |  |
|  |  |  |  |  | WRNIP1   |  |  |  |  |  |  |  |  |  |
|  |  |  |  |  | DUSP22   |  |  |  |  |  |  |  |  |  |
|  |  |  |  |  | TULP4    |  |  |  |  |  |  |  |  |  |
|  |  |  |  |  | RARS2    |  |  |  |  |  |  |  |  |  |
|  |  |  |  |  | HYMA1    |  |  |  |  |  |  |  |  |  |
|  |  |  |  |  | PDSS2    |  |  |  |  |  |  |  |  |  |
|  |  |  |  |  | GOPC     |  |  |  |  |  |  |  |  |  |
|  |  |  |  |  | LYRM4    |  |  |  |  |  |  |  |  |  |
|  |  |  |  |  | C6orf162 |  |  |  |  |  |  |  |  |  |
|  |  |  |  |  | VARS2    |  |  |  |  |  |  |  |  |  |
|  |  |  |  |  | GPR126   |  |  |  |  |  |  |  |  |  |
|  |  |  |  |  | KIAA1244 |  |  |  |  |  |  |  |  |  |
|  |  |  |  |  | NHSL1    |  |  |  |  |  |  |  |  |  |
|  |  |  |  |  | LYRM2    |  |  |  |  |  |  |  |  |  |
|  |  |  |  |  | SNX14    |  |  |  |  |  |  |  |  |  |
|  |  |  |  |  | MRS2     |  |  |  |  |  |  |  |  |  |
|  |  |  |  |  | PLEKHG1  |  |  |  |  |  |  |  |  |  |
|  |  |  |  |  | ARID1B   |  |  |  |  |  |  |  |  |  |
|  |  |  |  |  | LRFN2    |  |  |  |  |  |  |  |  |  |
|  |  |  |  |  | AARS2    |  |  |  |  |  |  |  |  |  |
|  |  |  |  |  | XPO5     |  |  |  |  |  |  |  |  |  |
|  |  |  |  |  | SERINC1  |  |  |  |  |  |  |  |  |  |
|  |  |  |  |  | HACE1    |  |  |  |  |  |  |  |  |  |
|  |  |  |  |  | FAM135A  |  |  |  |  |  |  |  |  |  |
|  |  |  |  |  | TMEM181  |  |  |  |  |  |  |  |  |  |
|  |  |  |  |  | ZBTB2    |  |  |  |  |  |  |  |  |  |
|  |  |  |  |  | BEND3    |  |  |  |  |  |  |  |  |  |
|  |  |  |  |  | KIAA1586 |  |  |  |  |  |  |  |  |  |
|  |  |  |  |  | CPNE5    |  |  |  |  |  |  |  |  |  |
|  |  |  |  |  | LSM2     |  |  |  |  |  |  |  |  |  |
|  |  |  |  |  | C6orf47  |  |  |  |  |  |  |  |  |  |
|  |  |  |  |  | LY6G5B   |  |  |  |  |  |  |  |  |  |
|  |  |  |  |  | C6orf115 |  |  |  |  |  |  |  |  |  |
|  |  |  |  |  | RRAGD    |  |  |  |  |  |  |  |  |  |
|  |  |  |  |  | LY6G6D   |  |  |  |  |  |  |  |  |  |
|  |  |  |  |  | ENPP5    |  |  |  |  |  |  |  |  |  |
|  |  |  |  |  | PRDM13   |  |  |  |  |  |  |  |  |  |
|  |  |  |  |  | PBOV1    |  |  |  |  |  |  |  |  |  |
|  |  |  |  |  | BACH2    |  |  |  |  |  |  |  |  |  |

|  |  |  |  |            |  |  |  |  |  |  |  |
|--|--|--|--|------------|--|--|--|--|--|--|--|
|  |  |  |  | ELOVL5     |  |  |  |  |  |  |  |
|  |  |  |  | TRMT11     |  |  |  |  |  |  |  |
|  |  |  |  | SMAP1      |  |  |  |  |  |  |  |
|  |  |  |  | ZFAND3     |  |  |  |  |  |  |  |
|  |  |  |  | SLC22A23   |  |  |  |  |  |  |  |
|  |  |  |  | C6orf164   |  |  |  |  |  |  |  |
|  |  |  |  | MUTED      |  |  |  |  |  |  |  |
|  |  |  |  | CCDC90A    |  |  |  |  |  |  |  |
|  |  |  |  | GPSM3      |  |  |  |  |  |  |  |
|  |  |  |  | FKBPL      |  |  |  |  |  |  |  |
|  |  |  |  | KIF13A     |  |  |  |  |  |  |  |
|  |  |  |  | PERP       |  |  |  |  |  |  |  |
|  |  |  |  | SMOC2      |  |  |  |  |  |  |  |
|  |  |  |  | POPDC3     |  |  |  |  |  |  |  |
|  |  |  |  | ZNF323     |  |  |  |  |  |  |  |
|  |  |  |  | ALDH8A1    |  |  |  |  |  |  |  |
|  |  |  |  | C6orf106   |  |  |  |  |  |  |  |
|  |  |  |  | MICAL1     |  |  |  |  |  |  |  |
|  |  |  |  | MRPL14     |  |  |  |  |  |  |  |
|  |  |  |  | DLK2       |  |  |  |  |  |  |  |
|  |  |  |  | LY6G6E     |  |  |  |  |  |  |  |
|  |  |  |  | ULBP3      |  |  |  |  |  |  |  |
|  |  |  |  | OR2A4      |  |  |  |  |  |  |  |
|  |  |  |  | C6orf211   |  |  |  |  |  |  |  |
|  |  |  |  | OGFRL1     |  |  |  |  |  |  |  |
|  |  |  |  | FAM184A    |  |  |  |  |  |  |  |
|  |  |  |  | ZDHHC14    |  |  |  |  |  |  |  |
|  |  |  |  | ZNF322     |  |  |  |  |  |  |  |
|  |  |  |  | MANEA      |  |  |  |  |  |  |  |
|  |  |  |  | ADGB       |  |  |  |  |  |  |  |
|  |  |  |  | TREML2     |  |  |  |  |  |  |  |
|  |  |  |  | RPP21      |  |  |  |  |  |  |  |
|  |  |  |  | LINC00472  |  |  |  |  |  |  |  |
|  |  |  |  | ATAT1      |  |  |  |  |  |  |  |
|  |  |  |  | FRMD1      |  |  |  |  |  |  |  |
|  |  |  |  | AGPAT4-IT1 |  |  |  |  |  |  |  |
|  |  |  |  | C6orf208   |  |  |  |  |  |  |  |
|  |  |  |  | C6orf97    |  |  |  |  |  |  |  |
|  |  |  |  | MYCT1      |  |  |  |  |  |  |  |
|  |  |  |  | ZKSCAN3    |  |  |  |  |  |  |  |
|  |  |  |  | ULBP2      |  |  |  |  |  |  |  |
|  |  |  |  | ULBP1      |  |  |  |  |  |  |  |
|  |  |  |  | ZSCAN16    |  |  |  |  |  |  |  |
|  |  |  |  | LPAL2      |  |  |  |  |  |  |  |
|  |  |  |  | RNF39      |  |  |  |  |  |  |  |
|  |  |  |  | SLC44A4    |  |  |  |  |  |  |  |
|  |  |  |  | VWA7       |  |  |  |  |  |  |  |
|  |  |  |  | C6orf25    |  |  |  |  |  |  |  |
|  |  |  |  | LY6G6C     |  |  |  |  |  |  |  |
|  |  |  |  | LY6G5C     |  |  |  |  |  |  |  |

© 2017 American Medical Association. All rights reserved.

|  |  |  |  |  |           |  |  |  |  |  |  |  |  |  |
|--|--|--|--|--|-----------|--|--|--|--|--|--|--|--|--|
|  |  |  |  |  | PRR3      |  |  |  |  |  |  |  |  |  |
|  |  |  |  |  | KHDC1     |  |  |  |  |  |  |  |  |  |
|  |  |  |  |  | ZNRD1-AS1 |  |  |  |  |  |  |  |  |  |
|  |  |  |  |  | PRRT1     |  |  |  |  |  |  |  |  |  |
|  |  |  |  |  | EGFL8     |  |  |  |  |  |  |  |  |  |
|  |  |  |  |  | HCG4B     |  |  |  |  |  |  |  |  |  |
|  |  |  |  |  | GPR63     |  |  |  |  |  |  |  |  |  |
|  |  |  |  |  | TXNDC5    |  |  |  |  |  |  |  |  |  |
|  |  |  |  |  | COL21A1   |  |  |  |  |  |  |  |  |  |
|  |  |  |  |  | C6orf62   |  |  |  |  |  |  |  |  |  |
|  |  |  |  |  | OR5V1     |  |  |  |  |  |  |  |  |  |
|  |  |  |  |  | OR2B2     |  |  |  |  |  |  |  |  |  |
|  |  |  |  |  | PPP1R14C  |  |  |  |  |  |  |  |  |  |
|  |  |  |  |  | OR12D3    |  |  |  |  |  |  |  |  |  |
|  |  |  |  |  | SPACA1    |  |  |  |  |  |  |  |  |  |
|  |  |  |  |  | RNF146    |  |  |  |  |  |  |  |  |  |
|  |  |  |  |  | TMEM14B   |  |  |  |  |  |  |  |  |  |
|  |  |  |  |  | SF3B5     |  |  |  |  |  |  |  |  |  |
|  |  |  |  |  | TAAR8     |  |  |  |  |  |  |  |  |  |
|  |  |  |  |  | SH3BGRL2  |  |  |  |  |  |  |  |  |  |
|  |  |  |  |  | RIOK1     |  |  |  |  |  |  |  |  |  |
|  |  |  |  |  | TFAP2D    |  |  |  |  |  |  |  |  |  |
|  |  |  |  |  | KCNK16    |  |  |  |  |  |  |  |  |  |
|  |  |  |  |  | RSPH3     |  |  |  |  |  |  |  |  |  |
|  |  |  |  |  | TLL2      |  |  |  |  |  |  |  |  |  |
|  |  |  |  |  | DTNBP1    |  |  |  |  |  |  |  |  |  |
|  |  |  |  |  | ARMC2     |  |  |  |  |  |  |  |  |  |
|  |  |  |  |  | FBXO30    |  |  |  |  |  |  |  |  |  |
|  |  |  |  |  | RPF2      |  |  |  |  |  |  |  |  |  |
|  |  |  |  |  | MNF1      |  |  |  |  |  |  |  |  |  |
|  |  |  |  |  | L3MBTL3   |  |  |  |  |  |  |  |  |  |
|  |  |  |  |  | FAM120B   |  |  |  |  |  |  |  |  |  |
|  |  |  |  |  | MCHR2     |  |  |  |  |  |  |  |  |  |
|  |  |  |  |  | PGBD1     |  |  |  |  |  |  |  |  |  |
|  |  |  |  |  | FAXC      |  |  |  |  |  |  |  |  |  |
|  |  |  |  |  | FNDC1     |  |  |  |  |  |  |  |  |  |
|  |  |  |  |  | TTBK1     |  |  |  |  |  |  |  |  |  |
|  |  |  |  |  | GJA10     |  |  |  |  |  |  |  |  |  |
|  |  |  |  |  | RTN4IP1   |  |  |  |  |  |  |  |  |  |
|  |  |  |  |  | ADTRP     |  |  |  |  |  |  |  |  |  |
|  |  |  |  |  | RSPO3     |  |  |  |  |  |  |  |  |  |
|  |  |  |  |  | LRP11     |  |  |  |  |  |  |  |  |  |
|  |  |  |  |  | LTV1      |  |  |  |  |  |  |  |  |  |
|  |  |  |  |  | SERAC1    |  |  |  |  |  |  |  |  |  |
|  |  |  |  |  | USP45     |  |  |  |  |  |  |  |  |  |
|  |  |  |  |  | REPS1     |  |  |  |  |  |  |  |  |  |
|  |  |  |  |  | HIST1H2AH |  |  |  |  |  |  |  |  |  |
|  |  |  |  |  | HIST1H2BK |  |  |  |  |  |  |  |  |  |
|  |  |  |  |  | PPIL4     |  |  |  |  |  |  |  |  |  |
|  |  |  |  |  | PAQR8     |  |  |  |  |  |  |  |  |  |

|  |  |  |  |  |           |  |  |  |  |  |  |  |  |  |
|--|--|--|--|--|-----------|--|--|--|--|--|--|--|--|--|
|  |  |  |  |  | SLC22A16  |  |  |  |  |  |  |  |  |  |
|  |  |  |  |  | RRP36     |  |  |  |  |  |  |  |  |  |
|  |  |  |  |  | C6orf7    |  |  |  |  |  |  |  |  |  |
|  |  |  |  |  | KCNK17    |  |  |  |  |  |  |  |  |  |
|  |  |  |  |  | ABCC10    |  |  |  |  |  |  |  |  |  |
|  |  |  |  |  | TRIM15    |  |  |  |  |  |  |  |  |  |
|  |  |  |  |  | KLC4      |  |  |  |  |  |  |  |  |  |
|  |  |  |  |  | UBE2CBP   |  |  |  |  |  |  |  |  |  |
|  |  |  |  |  | MLIP      |  |  |  |  |  |  |  |  |  |
|  |  |  |  |  | LINC00473 |  |  |  |  |  |  |  |  |  |
|  |  |  |  |  | KIAA1919  |  |  |  |  |  |  |  |  |  |
|  |  |  |  |  | TJAP1     |  |  |  |  |  |  |  |  |  |
|  |  |  |  |  | ARHGAP18  |  |  |  |  |  |  |  |  |  |
|  |  |  |  |  | POM121L2  |  |  |  |  |  |  |  |  |  |
|  |  |  |  |  | SYTL3     |  |  |  |  |  |  |  |  |  |
|  |  |  |  |  | FOXQ1     |  |  |  |  |  |  |  |  |  |
|  |  |  |  |  | GTF3C6    |  |  |  |  |  |  |  |  |  |
|  |  |  |  |  | MRAP2     |  |  |  |  |  |  |  |  |  |
|  |  |  |  |  | RWDD2A    |  |  |  |  |  |  |  |  |  |
|  |  |  |  |  | IL17F     |  |  |  |  |  |  |  |  |  |
|  |  |  |  |  | FAM54A    |  |  |  |  |  |  |  |  |  |
|  |  |  |  |  | SFT2D1    |  |  |  |  |  |  |  |  |  |
|  |  |  |  |  | EFHC1     |  |  |  |  |  |  |  |  |  |
|  |  |  |  |  | BTBD9     |  |  |  |  |  |  |  |  |  |
|  |  |  |  |  | KLHL32    |  |  |  |  |  |  |  |  |  |
|  |  |  |  |  | TMEM200A  |  |  |  |  |  |  |  |  |  |
|  |  |  |  |  | SCAND3    |  |  |  |  |  |  |  |  |  |
|  |  |  |  |  | MB21D1    |  |  |  |  |  |  |  |  |  |
|  |  |  |  |  | FOXP4     |  |  |  |  |  |  |  |  |  |
|  |  |  |  |  | KLHDC3    |  |  |  |  |  |  |  |  |  |
|  |  |  |  |  | NUS1      |  |  |  |  |  |  |  |  |  |
|  |  |  |  |  | C6orf72   |  |  |  |  |  |  |  |  |  |
|  |  |  |  |  | SLC26A8   |  |  |  |  |  |  |  |  |  |
|  |  |  |  |  | IL22RA2   |  |  |  |  |  |  |  |  |  |
|  |  |  |  |  | MAS1L     |  |  |  |  |  |  |  |  |  |
|  |  |  |  |  | C6orf192  |  |  |  |  |  |  |  |  |  |
|  |  |  |  |  | SLC16A10  |  |  |  |  |  |  |  |  |  |
|  |  |  |  |  | IP6K3     |  |  |  |  |  |  |  |  |  |
|  |  |  |  |  | TAGAP     |  |  |  |  |  |  |  |  |  |
|  |  |  |  |  | TAF8      |  |  |  |  |  |  |  |  |  |
|  |  |  |  |  | ADAT2     |  |  |  |  |  |  |  |  |  |
|  |  |  |  |  | RIPPLY2   |  |  |  |  |  |  |  |  |  |
|  |  |  |  |  | IRAK1BP1  |  |  |  |  |  |  |  |  |  |
|  |  |  |  |  | CLVS2     |  |  |  |  |  |  |  |  |  |
|  |  |  |  |  | TAAR9     |  |  |  |  |  |  |  |  |  |
|  |  |  |  |  | TAAR1     |  |  |  |  |  |  |  |  |  |
|  |  |  |  |  | STXBP5    |  |  |  |  |  |  |  |  |  |
|  |  |  |  |  | NCOA7     |  |  |  |  |  |  |  |  |  |
|  |  |  |  |  | HINT3     |  |  |  |  |  |  |  |  |  |
|  |  |  |  |  | PACRG     |  |  |  |  |  |  |  |  |  |

|  |  |  |  |  |              |  |  |  |  |  |  |  |
|--|--|--|--|--|--------------|--|--|--|--|--|--|--|
|  |  |  |  |  | B3GAT2       |  |  |  |  |  |  |  |
|  |  |  |  |  | C6orf57      |  |  |  |  |  |  |  |
|  |  |  |  |  | CD109        |  |  |  |  |  |  |  |
|  |  |  |  |  | RAET1E       |  |  |  |  |  |  |  |
|  |  |  |  |  | PM20D2       |  |  |  |  |  |  |  |
|  |  |  |  |  | SRSF12       |  |  |  |  |  |  |  |
|  |  |  |  |  | C6orf141     |  |  |  |  |  |  |  |
|  |  |  |  |  | HUS1B        |  |  |  |  |  |  |  |
|  |  |  |  |  | TRIM40       |  |  |  |  |  |  |  |
|  |  |  |  |  | DPCR1        |  |  |  |  |  |  |  |
|  |  |  |  |  | NRSN1        |  |  |  |  |  |  |  |
|  |  |  |  |  | LOC153910    |  |  |  |  |  |  |  |
|  |  |  |  |  | ZC2HC1B      |  |  |  |  |  |  |  |
|  |  |  |  |  | SNRNP48      |  |  |  |  |  |  |  |
|  |  |  |  |  | CNKSR3       |  |  |  |  |  |  |  |
|  |  |  |  |  | RAET1L       |  |  |  |  |  |  |  |
|  |  |  |  |  | SAMD3        |  |  |  |  |  |  |  |
|  |  |  |  |  | MGC34034     |  |  |  |  |  |  |  |
|  |  |  |  |  | SLC2A12      |  |  |  |  |  |  |  |
|  |  |  |  |  | LOC154092    |  |  |  |  |  |  |  |
|  |  |  |  |  | MBOAT1       |  |  |  |  |  |  |  |
|  |  |  |  |  | HDGFL1       |  |  |  |  |  |  |  |
|  |  |  |  |  | PNLDC1       |  |  |  |  |  |  |  |
|  |  |  |  |  | RNF217       |  |  |  |  |  |  |  |
|  |  |  |  |  | NKAIN2       |  |  |  |  |  |  |  |
|  |  |  |  |  | C6orf221     |  |  |  |  |  |  |  |
|  |  |  |  |  | C6orf165     |  |  |  |  |  |  |  |
|  |  |  |  |  | C6orf195     |  |  |  |  |  |  |  |
|  |  |  |  |  | BVES-AS1     |  |  |  |  |  |  |  |
|  |  |  |  |  | LOC154449    |  |  |  |  |  |  |  |
|  |  |  |  |  | CCDC167      |  |  |  |  |  |  |  |
|  |  |  |  |  | PRSS35       |  |  |  |  |  |  |  |
|  |  |  |  |  | LCA5         |  |  |  |  |  |  |  |
|  |  |  |  |  | OLIG3        |  |  |  |  |  |  |  |
|  |  |  |  |  | TXLNB        |  |  |  |  |  |  |  |
|  |  |  |  |  | DACT2        |  |  |  |  |  |  |  |
|  |  |  |  |  | C6orf118     |  |  |  |  |  |  |  |
|  |  |  |  |  | PSORS1C1     |  |  |  |  |  |  |  |
|  |  |  |  |  | PSORS1C2     |  |  |  |  |  |  |  |
|  |  |  |  |  | PPP1R18      |  |  |  |  |  |  |  |
|  |  |  |  |  | PTCRA        |  |  |  |  |  |  |  |
|  |  |  |  |  | OSTCP1       |  |  |  |  |  |  |  |
|  |  |  |  |  | TCTE1        |  |  |  |  |  |  |  |
|  |  |  |  |  | KHDRBS2      |  |  |  |  |  |  |  |
|  |  |  |  |  | TRIM39-RPP21 |  |  |  |  |  |  |  |
|  |  |  |  |  | TUBB         |  |  |  |  |  |  |  |
|  |  |  |  |  | C6orf163     |  |  |  |  |  |  |  |
|  |  |  |  |  | PIP5K1P1     |  |  |  |  |  |  |  |
|  |  |  |  |  | CCDC162P     |  |  |  |  |  |  |  |
|  |  |  |  |  | AKD1         |  |  |  |  |  |  |  |

|  |  |  |  |  |           |  |  |  |  |  |  |  |  |  |
|--|--|--|--|--|-----------|--|--|--|--|--|--|--|--|--|
|  |  |  |  |  | NT5DC1    |  |  |  |  |  |  |  |  |  |
|  |  |  |  |  | FAM26D    |  |  |  |  |  |  |  |  |  |
|  |  |  |  |  | ZUFSP     |  |  |  |  |  |  |  |  |  |
|  |  |  |  |  | FAM162B   |  |  |  |  |  |  |  |  |  |
|  |  |  |  |  | C6orf170  |  |  |  |  |  |  |  |  |  |
|  |  |  |  |  | BEND6     |  |  |  |  |  |  |  |  |  |
|  |  |  |  |  | GSTA5     |  |  |  |  |  |  |  |  |  |
|  |  |  |  |  | OPN5      |  |  |  |  |  |  |  |  |  |
|  |  |  |  |  | GPR115    |  |  |  |  |  |  |  |  |  |
|  |  |  |  |  | GPR116    |  |  |  |  |  |  |  |  |  |
|  |  |  |  |  | TDRD6     |  |  |  |  |  |  |  |  |  |
|  |  |  |  |  | SPATS1    |  |  |  |  |  |  |  |  |  |
|  |  |  |  |  | C6orf223  |  |  |  |  |  |  |  |  |  |
|  |  |  |  |  | RSPH9     |  |  |  |  |  |  |  |  |  |
|  |  |  |  |  | LRRC73    |  |  |  |  |  |  |  |  |  |
|  |  |  |  |  | TREML2P1  |  |  |  |  |  |  |  |  |  |
|  |  |  |  |  | LOC221442 |  |  |  |  |  |  |  |  |  |
|  |  |  |  |  | C6orf130  |  |  |  |  |  |  |  |  |  |
|  |  |  |  |  | KIF6      |  |  |  |  |  |  |  |  |  |
|  |  |  |  |  | TMEM217   |  |  |  |  |  |  |  |  |  |
|  |  |  |  |  | FGD2      |  |  |  |  |  |  |  |  |  |
|  |  |  |  |  | P116      |  |  |  |  |  |  |  |  |  |
|  |  |  |  |  | C6orf89   |  |  |  |  |  |  |  |  |  |
|  |  |  |  |  | ARMC12    |  |  |  |  |  |  |  |  |  |
|  |  |  |  |  | C6orf1    |  |  |  |  |  |  |  |  |  |
|  |  |  |  |  | LEMD2     |  |  |  |  |  |  |  |  |  |
|  |  |  |  |  | ZBTB9     |  |  |  |  |  |  |  |  |  |
|  |  |  |  |  | ZBTB12    |  |  |  |  |  |  |  |  |  |
|  |  |  |  |  | C6orf136  |  |  |  |  |  |  |  |  |  |
|  |  |  |  |  | ZSCAN12P1 |  |  |  |  |  |  |  |  |  |
|  |  |  |  |  | HIST1H2AA |  |  |  |  |  |  |  |  |  |
|  |  |  |  |  | KDM1B     |  |  |  |  |  |  |  |  |  |
|  |  |  |  |  | RBM24     |  |  |  |  |  |  |  |  |  |
|  |  |  |  |  | RNF182    |  |  |  |  |  |  |  |  |  |
|  |  |  |  |  | PHACTR1   |  |  |  |  |  |  |  |  |  |
|  |  |  |  |  | C6orf228  |  |  |  |  |  |  |  |  |  |
|  |  |  |  |  | SYCP2L    |  |  |  |  |  |  |  |  |  |
|  |  |  |  |  | LINC00518 |  |  |  |  |  |  |  |  |  |
|  |  |  |  |  | PXDC1     |  |  |  |  |  |  |  |  |  |
|  |  |  |  |  | MGC39372  |  |  |  |  |  |  |  |  |  |
|  |  |  |  |  | HS3ST5    |  |  |  |  |  |  |  |  |  |
|  |  |  |  |  | GPRC6A    |  |  |  |  |  |  |  |  |  |
|  |  |  |  |  | RFX6      |  |  |  |  |  |  |  |  |  |
|  |  |  |  |  | SLC35F1   |  |  |  |  |  |  |  |  |  |
|  |  |  |  |  | FAM83B    |  |  |  |  |  |  |  |  |  |
|  |  |  |  |  | GPR111    |  |  |  |  |  |  |  |  |  |
|  |  |  |  |  | TSP02     |  |  |  |  |  |  |  |  |  |
|  |  |  |  |  | UNC5CL    |  |  |  |  |  |  |  |  |  |
|  |  |  |  |  | KCTD20    |  |  |  |  |  |  |  |  |  |
|  |  |  |  |  | PXT1      |  |  |  |  |  |  |  |  |  |

|  |  |  |  |  |           |  |  |  |  |  |  |  |  |  |  |
|--|--|--|--|--|-----------|--|--|--|--|--|--|--|--|--|--|
|  |  |  |  |  | LHFPL5    |  |  |  |  |  |  |  |  |  |  |
|  |  |  |  |  | SCUBE3    |  |  |  |  |  |  |  |  |  |  |
|  |  |  |  |  | ZSCAN23   |  |  |  |  |  |  |  |  |  |  |
|  |  |  |  |  | NKAPL     |  |  |  |  |  |  |  |  |  |  |
|  |  |  |  |  | TOB2P1    |  |  |  |  |  |  |  |  |  |  |
|  |  |  |  |  | FAM217A   |  |  |  |  |  |  |  |  |  |  |
|  |  |  |  |  | VGLL2     |  |  |  |  |  |  |  |  |  |  |
|  |  |  |  |  | DEFB110   |  |  |  |  |  |  |  |  |  |  |
|  |  |  |  |  | DEFB112   |  |  |  |  |  |  |  |  |  |  |
|  |  |  |  |  | DEFB113   |  |  |  |  |  |  |  |  |  |  |
|  |  |  |  |  | DEFB114   |  |  |  |  |  |  |  |  |  |  |
|  |  |  |  |  | LACE1     |  |  |  |  |  |  |  |  |  |  |
|  |  |  |  |  | HCG27     |  |  |  |  |  |  |  |  |  |  |
|  |  |  |  |  | C6orf191  |  |  |  |  |  |  |  |  |  |  |
|  |  |  |  |  | MMS22L    |  |  |  |  |  |  |  |  |  |  |
|  |  |  |  |  | WDR27     |  |  |  |  |  |  |  |  |  |  |
|  |  |  |  |  | FAM26E    |  |  |  |  |  |  |  |  |  |  |
|  |  |  |  |  | MCM9      |  |  |  |  |  |  |  |  |  |  |
|  |  |  |  |  | RNF144B   |  |  |  |  |  |  |  |  |  |  |
|  |  |  |  |  | HIST1H2BA |  |  |  |  |  |  |  |  |  |  |
|  |  |  |  |  | SCML4     |  |  |  |  |  |  |  |  |  |  |
|  |  |  |  |  | GPX6      |  |  |  |  |  |  |  |  |  |  |
|  |  |  |  |  | SHPRH     |  |  |  |  |  |  |  |  |  |  |
|  |  |  |  |  | NCR3      |  |  |  |  |  |  |  |  |  |  |
|  |  |  |  |  | LY6G6F    |  |  |  |  |  |  |  |  |  |  |
|  |  |  |  |  | MDGA1     |  |  |  |  |  |  |  |  |  |  |
|  |  |  |  |  | GPR110    |  |  |  |  |  |  |  |  |  |  |
|  |  |  |  |  | ZNF311    |  |  |  |  |  |  |  |  |  |  |
|  |  |  |  |  | LINC00326 |  |  |  |  |  |  |  |  |  |  |
|  |  |  |  |  | LOC285740 |  |  |  |  |  |  |  |  |  |  |
|  |  |  |  |  | CEP57L1   |  |  |  |  |  |  |  |  |  |  |
|  |  |  |  |  | PPIL6     |  |  |  |  |  |  |  |  |  |  |
|  |  |  |  |  | LOC285758 |  |  |  |  |  |  |  |  |  |  |
|  |  |  |  |  | FLJ34503  |  |  |  |  |  |  |  |  |  |  |
|  |  |  |  |  | DCBLD1    |  |  |  |  |  |  |  |  |  |  |
|  |  |  |  |  | LOC285762 |  |  |  |  |  |  |  |  |  |  |
|  |  |  |  |  | LOC285768 |  |  |  |  |  |  |  |  |  |  |
|  |  |  |  |  | LY86-AS1  |  |  |  |  |  |  |  |  |  |  |
|  |  |  |  |  | CAGE1     |  |  |  |  |  |  |  |  |  |  |
|  |  |  |  |  | LOC285796 |  |  |  |  |  |  |  |  |  |  |
|  |  |  |  |  | PRR18     |  |  |  |  |  |  |  |  |  |  |
|  |  |  |  |  | LOC285819 |  |  |  |  |  |  |  |  |  |  |
|  |  |  |  |  | HLA-F-AS1 |  |  |  |  |  |  |  |  |  |  |
|  |  |  |  |  | HCG22     |  |  |  |  |  |  |  |  |  |  |
|  |  |  |  |  | LOC285847 |  |  |  |  |  |  |  |  |  |  |
|  |  |  |  |  | PNPLA1    |  |  |  |  |  |  |  |  |  |  |
|  |  |  |  |  | TREML4    |  |  |  |  |  |  |  |  |  |  |
|  |  |  |  |  | RPL7L1    |  |  |  |  |  |  |  |  |  |  |
|  |  |  |  |  | RNF5P1    |  |  |  |  |  |  |  |  |  |  |
|  |  |  |  |  | TAAR6     |  |  |  |  |  |  |  |  |  |  |



|  |  |  |  |  |                |  |  |  |  |  |  |  |
|--|--|--|--|--|----------------|--|--|--|--|--|--|--|
|  |  |  |  |  | SLC35D3        |  |  |  |  |  |  |  |
|  |  |  |  |  | ZC3H12D        |  |  |  |  |  |  |  |
|  |  |  |  |  | MYLK4          |  |  |  |  |  |  |  |
|  |  |  |  |  | DPPA5          |  |  |  |  |  |  |  |
|  |  |  |  |  | IFITM4P        |  |  |  |  |  |  |  |
|  |  |  |  |  | CLPSL1         |  |  |  |  |  |  |  |
|  |  |  |  |  | TREML1         |  |  |  |  |  |  |  |
|  |  |  |  |  | TREML3         |  |  |  |  |  |  |  |
|  |  |  |  |  | RSPH4A         |  |  |  |  |  |  |  |
|  |  |  |  |  | ECT2L          |  |  |  |  |  |  |  |
|  |  |  |  |  | EYS            |  |  |  |  |  |  |  |
|  |  |  |  |  | ZNF391         |  |  |  |  |  |  |  |
|  |  |  |  |  | ZFP57          |  |  |  |  |  |  |  |
|  |  |  |  |  | TUBB2B         |  |  |  |  |  |  |  |
|  |  |  |  |  | SLC35B2        |  |  |  |  |  |  |  |
|  |  |  |  |  | C6orf52        |  |  |  |  |  |  |  |
|  |  |  |  |  | NUP43          |  |  |  |  |  |  |  |
|  |  |  |  |  | HCG26          |  |  |  |  |  |  |  |
|  |  |  |  |  | C6orf58        |  |  |  |  |  |  |  |
|  |  |  |  |  | RAET1G         |  |  |  |  |  |  |  |
|  |  |  |  |  | KAAG1          |  |  |  |  |  |  |  |
|  |  |  |  |  | GUSBP4         |  |  |  |  |  |  |  |
|  |  |  |  |  | GJB7           |  |  |  |  |  |  |  |
|  |  |  |  |  | NHLRC1         |  |  |  |  |  |  |  |
|  |  |  |  |  | ZKSCAN4        |  |  |  |  |  |  |  |
|  |  |  |  |  | GUSBP2         |  |  |  |  |  |  |  |
|  |  |  |  |  | HMGA1P7        |  |  |  |  |  |  |  |
|  |  |  |  |  | SNHG5          |  |  |  |  |  |  |  |
|  |  |  |  |  | SUMO4          |  |  |  |  |  |  |  |
|  |  |  |  |  | C6orf147       |  |  |  |  |  |  |  |
|  |  |  |  |  | CENPW          |  |  |  |  |  |  |  |
|  |  |  |  |  | C6orf174       |  |  |  |  |  |  |  |
|  |  |  |  |  | LINC00222      |  |  |  |  |  |  |  |
|  |  |  |  |  | CEP85L         |  |  |  |  |  |  |  |
|  |  |  |  |  | C6orf120       |  |  |  |  |  |  |  |
|  |  |  |  |  | VN1R10P        |  |  |  |  |  |  |  |
|  |  |  |  |  | HIST1H2APS1    |  |  |  |  |  |  |  |
|  |  |  |  |  | THEMIS         |  |  |  |  |  |  |  |
|  |  |  |  |  | PSMG4          |  |  |  |  |  |  |  |
|  |  |  |  |  | SFTA2          |  |  |  |  |  |  |  |
|  |  |  |  |  | CLPSL2         |  |  |  |  |  |  |  |
|  |  |  |  |  | C6orf222       |  |  |  |  |  |  |  |
|  |  |  |  |  | GLYATL3        |  |  |  |  |  |  |  |
|  |  |  |  |  | GFRAL          |  |  |  |  |  |  |  |
|  |  |  |  |  | LIN28B         |  |  |  |  |  |  |  |
|  |  |  |  |  | SAMD5          |  |  |  |  |  |  |  |
|  |  |  |  |  | IYD            |  |  |  |  |  |  |  |
|  |  |  |  |  | MUC21          |  |  |  |  |  |  |  |
|  |  |  |  |  | DKFZP686I15217 |  |  |  |  |  |  |  |
|  |  |  |  |  | FLJ23152       |  |  |  |  |  |  |  |

|  |  |  |  |  |              |  |  |  |  |  |  |  |  |  |  |  |  |  |  |
|--|--|--|--|--|--------------|--|--|--|--|--|--|--|--|--|--|--|--|--|--|
|  |  |  |  |  | LINC00340    |  |  |  |  |  |  |  |  |  |  |  |  |  |  |
|  |  |  |  |  | LOC401242    |  |  |  |  |  |  |  |  |  |  |  |  |  |  |
|  |  |  |  |  | MCCD1        |  |  |  |  |  |  |  |  |  |  |  |  |  |  |
|  |  |  |  |  | SAPCD1       |  |  |  |  |  |  |  |  |  |  |  |  |  |  |
|  |  |  |  |  | LINC00336    |  |  |  |  |  |  |  |  |  |  |  |  |  |  |
|  |  |  |  |  | FLJ41649     |  |  |  |  |  |  |  |  |  |  |  |  |  |  |
|  |  |  |  |  | CRIP3        |  |  |  |  |  |  |  |  |  |  |  |  |  |  |
|  |  |  |  |  | KLHL31       |  |  |  |  |  |  |  |  |  |  |  |  |  |  |
|  |  |  |  |  | DKFZp451B082 |  |  |  |  |  |  |  |  |  |  |  |  |  |  |
|  |  |  |  |  | TCP10L2      |  |  |  |  |  |  |  |  |  |  |  |  |  |  |
|  |  |  |  |  | LINC00242    |  |  |  |  |  |  |  |  |  |  |  |  |  |  |
|  |  |  |  |  | DEFB133      |  |  |  |  |  |  |  |  |  |  |  |  |  |  |
|  |  |  |  |  | C6orf201     |  |  |  |  |  |  |  |  |  |  |  |  |  |  |
|  |  |  |  |  | GTF2H5       |  |  |  |  |  |  |  |  |  |  |  |  |  |  |
|  |  |  |  |  | ERVFRD-1     |  |  |  |  |  |  |  |  |  |  |  |  |  |  |
|  |  |  |  |  | MIR206       |  |  |  |  |  |  |  |  |  |  |  |  |  |  |
|  |  |  |  |  | MIR219-1     |  |  |  |  |  |  |  |  |  |  |  |  |  |  |
|  |  |  |  |  | MIR30A       |  |  |  |  |  |  |  |  |  |  |  |  |  |  |
|  |  |  |  |  | MIR30C2      |  |  |  |  |  |  |  |  |  |  |  |  |  |  |
|  |  |  |  |  | HCG23        |  |  |  |  |  |  |  |  |  |  |  |  |  |  |
|  |  |  |  |  | HCG25        |  |  |  |  |  |  |  |  |  |  |  |  |  |  |
|  |  |  |  |  | HCG18        |  |  |  |  |  |  |  |  |  |  |  |  |  |  |
|  |  |  |  |  | C6orf226     |  |  |  |  |  |  |  |  |  |  |  |  |  |  |
|  |  |  |  |  | TMEM151B     |  |  |  |  |  |  |  |  |  |  |  |  |  |  |
|  |  |  |  |  | OEOP         |  |  |  |  |  |  |  |  |  |  |  |  |  |  |
|  |  |  |  |  | FAM26F       |  |  |  |  |  |  |  |  |  |  |  |  |  |  |
|  |  |  |  |  | FLJ46906     |  |  |  |  |  |  |  |  |  |  |  |  |  |  |
|  |  |  |  |  | LOC441177    |  |  |  |  |  |  |  |  |  |  |  |  |  |  |
|  |  |  |  |  | OR2B3        |  |  |  |  |  |  |  |  |  |  |  |  |  |  |
|  |  |  |  |  | OR2J3        |  |  |  |  |  |  |  |  |  |  |  |  |  |  |
|  |  |  |  |  | OR14J1       |  |  |  |  |  |  |  |  |  |  |  |  |  |  |
|  |  |  |  |  | OR10C1       |  |  |  |  |  |  |  |  |  |  |  |  |  |  |
|  |  |  |  |  | ATP6V0CP3    |  |  |  |  |  |  |  |  |  |  |  |  |  |  |
|  |  |  |  |  | PTCHD4       |  |  |  |  |  |  |  |  |  |  |  |  |  |  |
|  |  |  |  |  | MCART3P      |  |  |  |  |  |  |  |  |  |  |  |  |  |  |
|  |  |  |  |  | GSTM2P1      |  |  |  |  |  |  |  |  |  |  |  |  |  |  |
|  |  |  |  |  | RFPL4B       |  |  |  |  |  |  |  |  |  |  |  |  |  |  |
|  |  |  |  |  | MIR133B      |  |  |  |  |  |  |  |  |  |  |  |  |  |  |
|  |  |  |  |  | GGNBP1       |  |  |  |  |  |  |  |  |  |  |  |  |  |  |
|  |  |  |  |  | HCG11        |  |  |  |  |  |  |  |  |  |  |  |  |  |  |
|  |  |  |  |  | LOC554223    |  |  |  |  |  |  |  |  |  |  |  |  |  |  |
|  |  |  |  |  | SNORD101     |  |  |  |  |  |  |  |  |  |  |  |  |  |  |
|  |  |  |  |  | SNORD100     |  |  |  |  |  |  |  |  |  |  |  |  |  |  |
|  |  |  |  |  | SNORA33      |  |  |  |  |  |  |  |  |  |  |  |  |  |  |
|  |  |  |  |  | C6orf225     |  |  |  |  |  |  |  |  |  |  |  |  |  |  |
|  |  |  |  |  | TSG1         |  |  |  |  |  |  |  |  |  |  |  |  |  |  |
|  |  |  |  |  | LOC643623    |  |  |  |  |  |  |  |  |  |  |  |  |  |  |
|  |  |  |  |  | TRAF3IP2-AS1 |  |  |  |  |  |  |  |  |  |  |  |  |  |  |
|  |  |  |  |  | CTAGE9       |  |  |  |  |  |  |  |  |  |  |  |  |  |  |
|  |  |  |  |  | LOC645434    |  |  |  |  |  |  |  |  |  |  |  |  |  |  |

|  |  |  |  |              |  |  |  |  |  |  |  |
|--|--|--|--|--------------|--|--|--|--|--|--|--|
|  |  |  |  | RAET1K       |  |  |  |  |  |  |  |
|  |  |  |  | C6orf132     |  |  |  |  |  |  |  |
|  |  |  |  | RPS16P5      |  |  |  |  |  |  |  |
|  |  |  |  | PPP1R3G      |  |  |  |  |  |  |  |
|  |  |  |  | MLLT4-AS1    |  |  |  |  |  |  |  |
|  |  |  |  | SNORA20      |  |  |  |  |  |  |  |
|  |  |  |  | SNORA29      |  |  |  |  |  |  |  |
|  |  |  |  | SNORA38      |  |  |  |  |  |  |  |
|  |  |  |  | SNORD50B     |  |  |  |  |  |  |  |
|  |  |  |  | SNORD32B     |  |  |  |  |  |  |  |
|  |  |  |  | SNORD84      |  |  |  |  |  |  |  |
|  |  |  |  | SNORD117     |  |  |  |  |  |  |  |
|  |  |  |  | MIR548A1     |  |  |  |  |  |  |  |
|  |  |  |  | MIR548B      |  |  |  |  |  |  |  |
|  |  |  |  | MIR586       |  |  |  |  |  |  |  |
|  |  |  |  | LOC728012    |  |  |  |  |  |  |  |
|  |  |  |  | TPI1P3       |  |  |  |  |  |  |  |
|  |  |  |  | C6orf186     |  |  |  |  |  |  |  |
|  |  |  |  | HULC         |  |  |  |  |  |  |  |
|  |  |  |  | LOC729176    |  |  |  |  |  |  |  |
|  |  |  |  | LOC729177    |  |  |  |  |  |  |  |
|  |  |  |  | LOC729178    |  |  |  |  |  |  |  |
|  |  |  |  | TMEM242      |  |  |  |  |  |  |  |
|  |  |  |  | LOC729603    |  |  |  |  |  |  |  |
|  |  |  |  | LOC730101    |  |  |  |  |  |  |  |
|  |  |  |  | GSTA7P       |  |  |  |  |  |  |  |
|  |  |  |  | TDRG1        |  |  |  |  |  |  |  |
|  |  |  |  | TMEM170B     |  |  |  |  |  |  |  |
|  |  |  |  | SCARNA27     |  |  |  |  |  |  |  |
|  |  |  |  | MIR877       |  |  |  |  |  |  |  |
|  |  |  |  | HGC6.3       |  |  |  |  |  |  |  |
|  |  |  |  | LOC100128176 |  |  |  |  |  |  |  |
|  |  |  |  | BET3L        |  |  |  |  |  |  |  |
|  |  |  |  | KHDC1L       |  |  |  |  |  |  |  |
|  |  |  |  | LOC100129518 |  |  |  |  |  |  |  |
|  |  |  |  | LOC100129636 |  |  |  |  |  |  |  |
|  |  |  |  | LOC100130275 |  |  |  |  |  |  |  |
|  |  |  |  | LOC100130357 |  |  |  |  |  |  |  |
|  |  |  |  | PSORS1C3     |  |  |  |  |  |  |  |
|  |  |  |  | LOC100130890 |  |  |  |  |  |  |  |
|  |  |  |  | C6orf99      |  |  |  |  |  |  |  |
|  |  |  |  | LOC100131047 |  |  |  |  |  |  |  |
|  |  |  |  | LOC100131289 |  |  |  |  |  |  |  |
|  |  |  |  | LINC00271    |  |  |  |  |  |  |  |
|  |  |  |  | LOC100132354 |  |  |  |  |  |  |  |
|  |  |  |  | LOC100132735 |  |  |  |  |  |  |  |
|  |  |  |  | LINC00240    |  |  |  |  |  |  |  |
|  |  |  |  | TOMM6        |  |  |  |  |  |  |  |
|  |  |  |  | LOC100270746 |  |  |  |  |  |  |  |
|  |  |  |  | LOC100287632 |  |  |  |  |  |  |  |

|  |  |  |  |  |                     |  |  |  |  |  |  |  |
|--|--|--|--|--|---------------------|--|--|--|--|--|--|--|
|  |  |  |  |  | LOC100287718        |  |  |  |  |  |  |  |
|  |  |  |  |  | LOC100288198        |  |  |  |  |  |  |  |
|  |  |  |  |  | LOC100289495        |  |  |  |  |  |  |  |
|  |  |  |  |  | LOC100293534        |  |  |  |  |  |  |  |
|  |  |  |  |  | LOC100294145        |  |  |  |  |  |  |  |
|  |  |  |  |  | NHEG1               |  |  |  |  |  |  |  |
|  |  |  |  |  | MIR1275             |  |  |  |  |  |  |  |
|  |  |  |  |  | MIR1913             |  |  |  |  |  |  |  |
|  |  |  |  |  | MIR2113             |  |  |  |  |  |  |  |
|  |  |  |  |  | MIR1236             |  |  |  |  |  |  |  |
|  |  |  |  |  | MIR548H3            |  |  |  |  |  |  |  |
|  |  |  |  |  | LOC100422737        |  |  |  |  |  |  |  |
|  |  |  |  |  | MIR3143             |  |  |  |  |  |  |  |
|  |  |  |  |  | MIR3145             |  |  |  |  |  |  |  |
|  |  |  |  |  | MIR4282             |  |  |  |  |  |  |  |
|  |  |  |  |  | MIR3918             |  |  |  |  |  |  |  |
|  |  |  |  |  | MIR3939             |  |  |  |  |  |  |  |
|  |  |  |  |  | MIR3668             |  |  |  |  |  |  |  |
|  |  |  |  |  | MIR3662             |  |  |  |  |  |  |  |
|  |  |  |  |  | MIR3925             |  |  |  |  |  |  |  |
|  |  |  |  |  | MIR3692             |  |  |  |  |  |  |  |
|  |  |  |  |  | MIR3691             |  |  |  |  |  |  |  |
|  |  |  |  |  | LOC100506207        |  |  |  |  |  |  |  |
|  |  |  |  |  | LOC100506409        |  |  |  |  |  |  |  |
|  |  |  |  |  | LOC100506804        |  |  |  |  |  |  |  |
|  |  |  |  |  | LOC100507173        |  |  |  |  |  |  |  |
|  |  |  |  |  | LOC100507194        |  |  |  |  |  |  |  |
|  |  |  |  |  | LOC100507203        |  |  |  |  |  |  |  |
|  |  |  |  |  | LOC100507254        |  |  |  |  |  |  |  |
|  |  |  |  |  | LOC100507362        |  |  |  |  |  |  |  |
|  |  |  |  |  | MICA                |  |  |  |  |  |  |  |
|  |  |  |  |  | LOC100507462        |  |  |  |  |  |  |  |
|  |  |  |  |  | LOC100507463        |  |  |  |  |  |  |  |
|  |  |  |  |  | LOC100507489        |  |  |  |  |  |  |  |
|  |  |  |  |  | LOC100507547        |  |  |  |  |  |  |  |
|  |  |  |  |  | LOC100507557        |  |  |  |  |  |  |  |
|  |  |  |  |  | LOC100507584        |  |  |  |  |  |  |  |
|  |  |  |  |  | MUC22               |  |  |  |  |  |  |  |
|  |  |  |  |  | LOC100508120        |  |  |  |  |  |  |  |
|  |  |  |  |  | CAHM                |  |  |  |  |  |  |  |
|  |  |  |  |  | MUTED-TXNDC5        |  |  |  |  |  |  |  |
|  |  |  |  |  | EEF1E1-MUTED        |  |  |  |  |  |  |  |
|  |  |  |  |  | RPS10-NUDT3         |  |  |  |  |  |  |  |
|  |  |  |  |  | MSH5-SAPCD1         |  |  |  |  |  |  |  |
|  |  |  |  |  | ATP6V1G2-<br>DDX39B |  |  |  |  |  |  |  |
|  |  |  |  |  | PPT2-EGFL8          |  |  |  |  |  |  |  |
|  |  |  |  |  | MIR4464             |  |  |  |  |  |  |  |
|  |  |  |  |  | MIR4647             |  |  |  |  |  |  |  |
|  |  |  |  |  | MIR4466             |  |  |  |  |  |  |  |

|  |  |  |  |  |              |  |  |  |  |  |  |  |  |
|--|--|--|--|--|--------------|--|--|--|--|--|--|--|--|
|  |  |  |  |  | MIR4643      |  |  |  |  |  |  |  |  |
|  |  |  |  |  | MIR4641      |  |  |  |  |  |  |  |  |
|  |  |  |  |  | MIR4465      |  |  |  |  |  |  |  |  |
|  |  |  |  |  | MIR4646      |  |  |  |  |  |  |  |  |
|  |  |  |  |  | MIR4640      |  |  |  |  |  |  |  |  |
|  |  |  |  |  | MIR4639      |  |  |  |  |  |  |  |  |
|  |  |  |  |  | MIR4645      |  |  |  |  |  |  |  |  |
|  |  |  |  |  | MIR4642      |  |  |  |  |  |  |  |  |
|  |  |  |  |  | MIR4462      |  |  |  |  |  |  |  |  |
|  |  |  |  |  | MIR4644      |  |  |  |  |  |  |  |  |
|  |  |  |  |  | LOC100652739 |  |  |  |  |  |  |  |  |

**eTable 4.** Specific deleted gene (Del\_Genes) regions identified by GISTIC analysis with a q-value significance score < 0.2. Chromosome 6p gain was noted in all samples.

|                      |                        |                         |                         |                         |                      |
|----------------------|------------------------|-------------------------|-------------------------|-------------------------|----------------------|
| cytoband             | 3q11.1                 | 12q14.2                 | 16q24.2                 | 21q11.2                 | Xp22.33              |
| q value              | 0.0029269              | 0.089361                | 0.19893                 | 0.1887                  | 0.0048605            |
| residual q value     | 0.0029269              | 0.089361                | 0.19893                 | 0.1887                  | 0.0048605            |
| wide peak boundaries | chr3:89521354-93709932 | chr12:63544058-64181655 | chr16:88104957-88524995 | chr21:11095865-14991078 | chrX:1652540-2533608 |
| genes in wide peak   | PROS1                  | DPY19L2                 | ZNF469                  | hsa-mir-3156-3          | ASMT                 |
| cytoband             |                        |                         |                         | ANKRD30BP2              | AKAP17A              |
| q value              |                        |                         |                         | MIR3156-3               | ZBED1                |
| residual q value     |                        |                         |                         |                         | DHRX                 |
| wide peak boundaries |                        |                         |                         |                         | LINC00102            |
